# Supplementary material
Source: PubMed Central journal article supplement (PMC3280552)

9-23-09, m9/22/09 A, samples: 8/19/09 at 8/

Exp. IP/FYND WB; IB/pSec<sup>Y411</sup> -/+

Fig3A-1

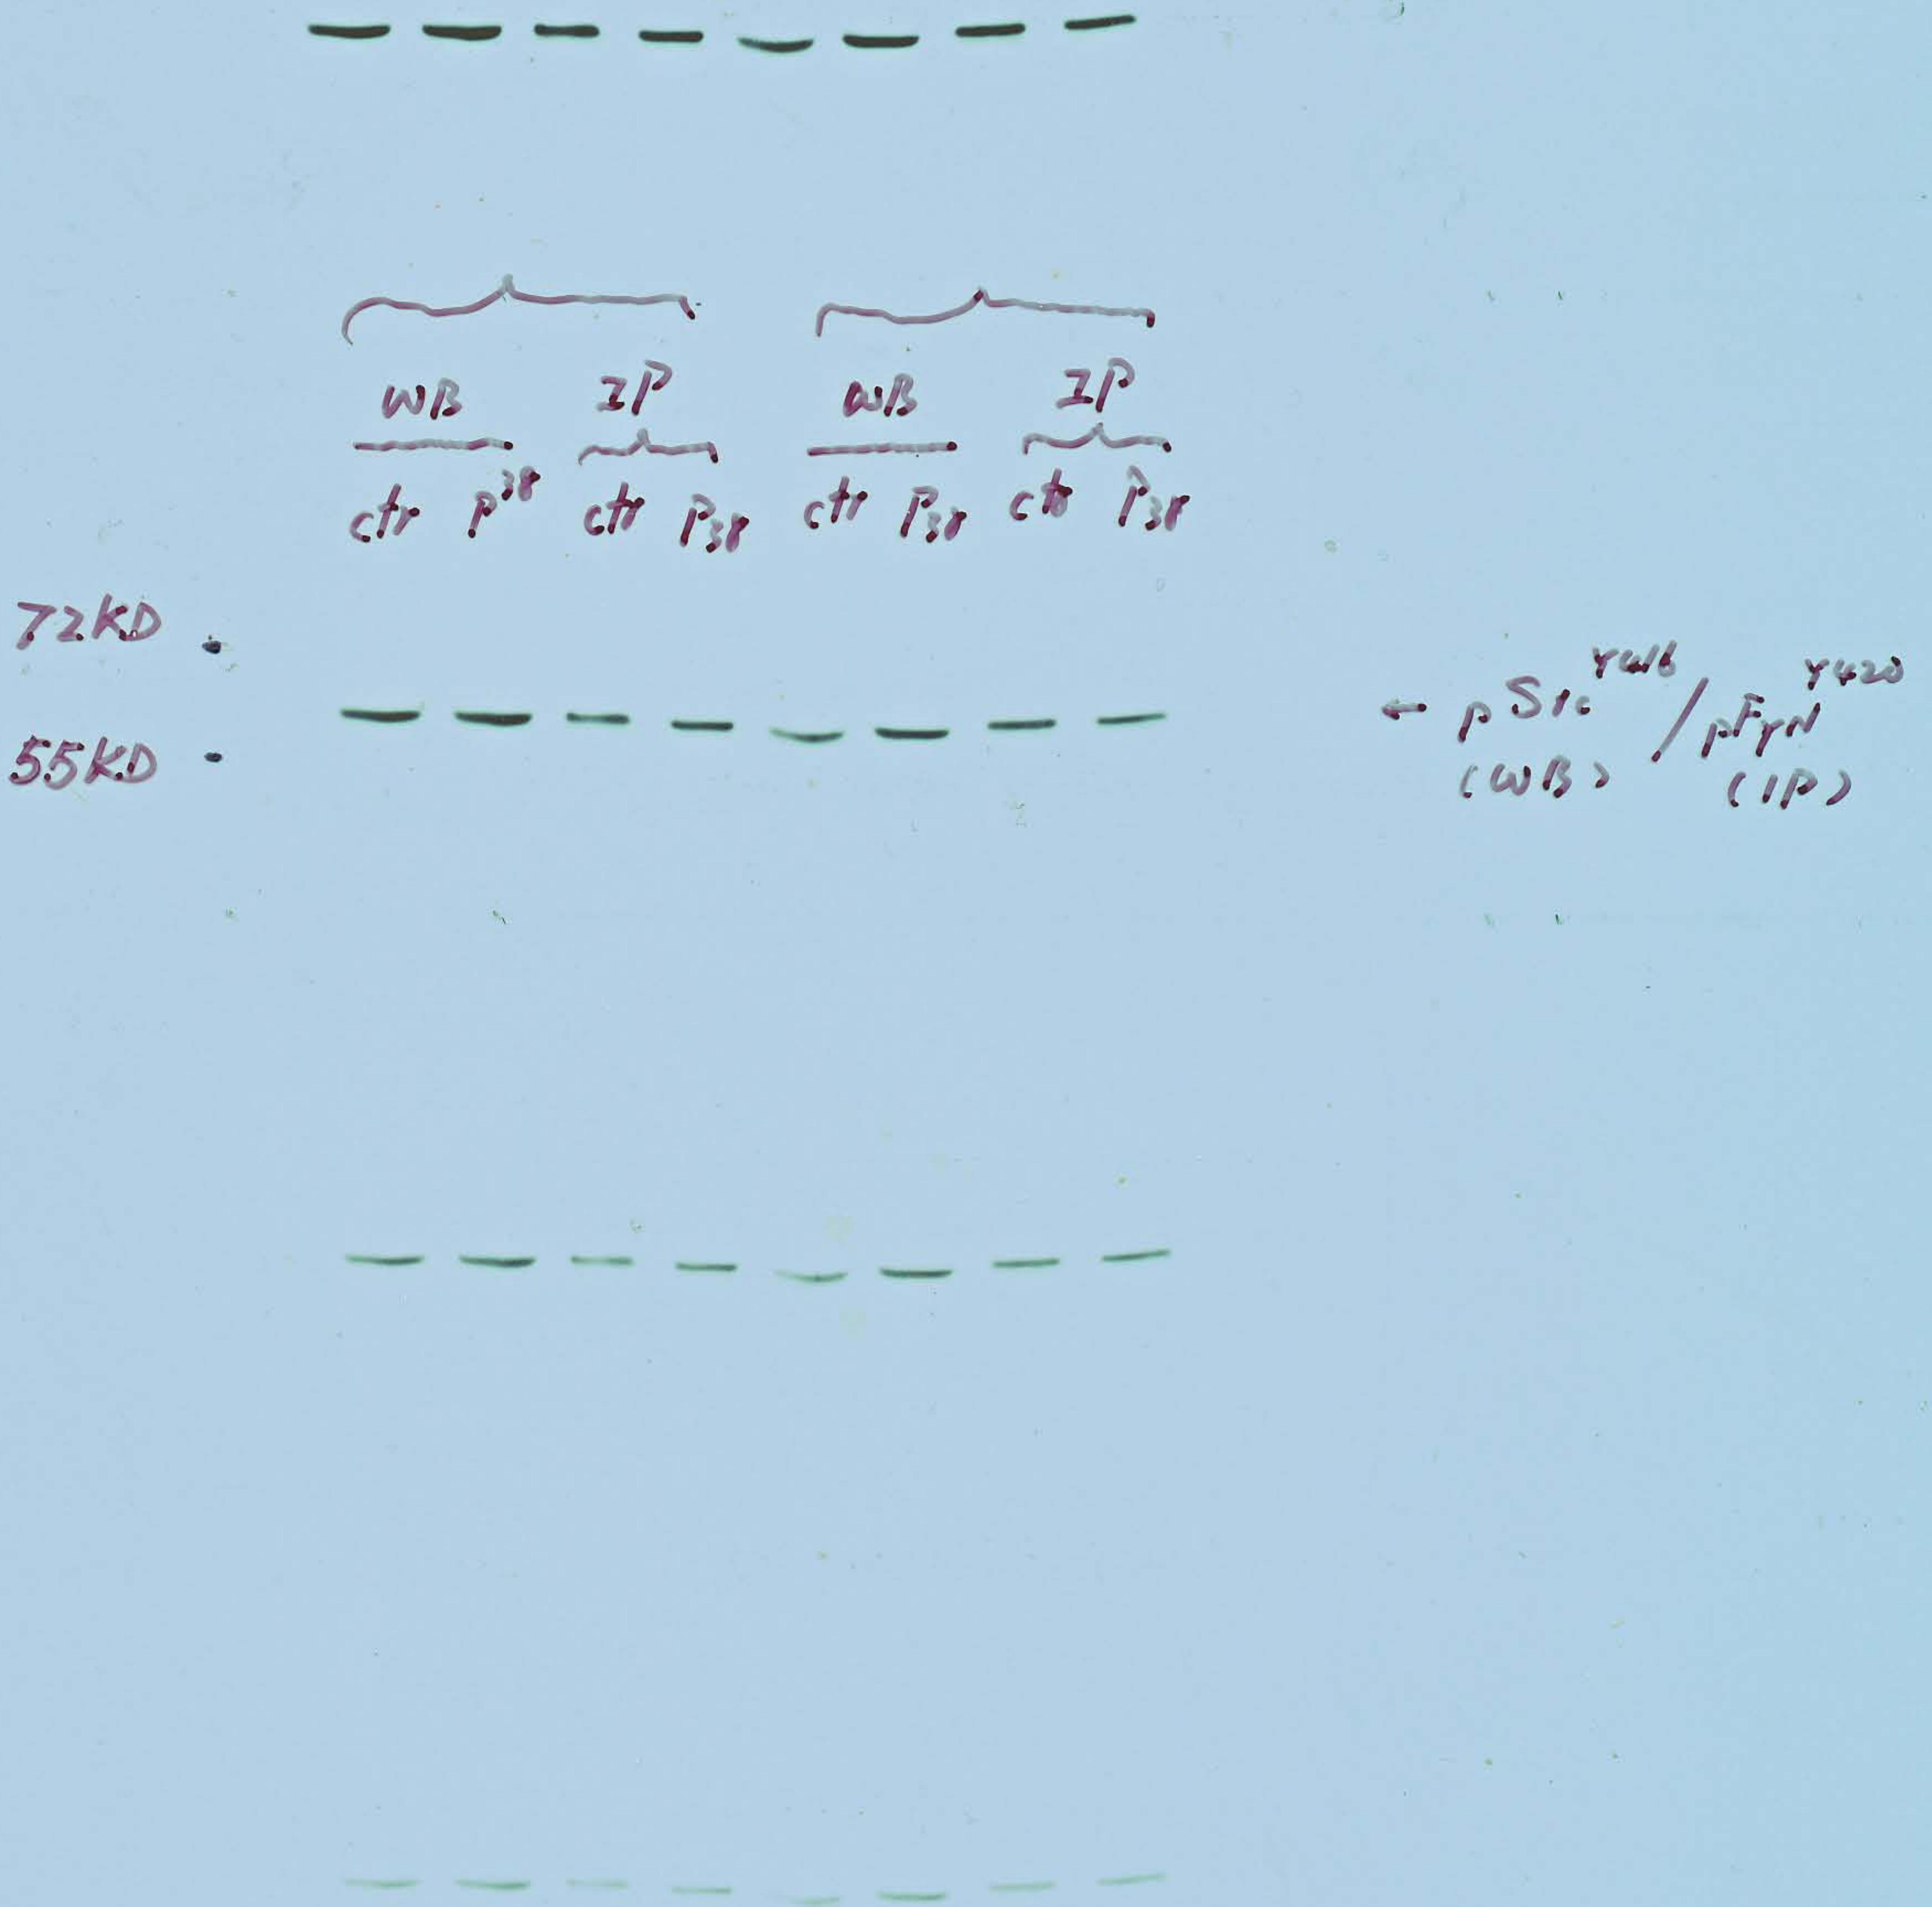



9-25-09, m. 9/22/09 A F/F  
Exp. 2P/FYN<sup>or</sup> & WB; IB/Src

Fig3A-2

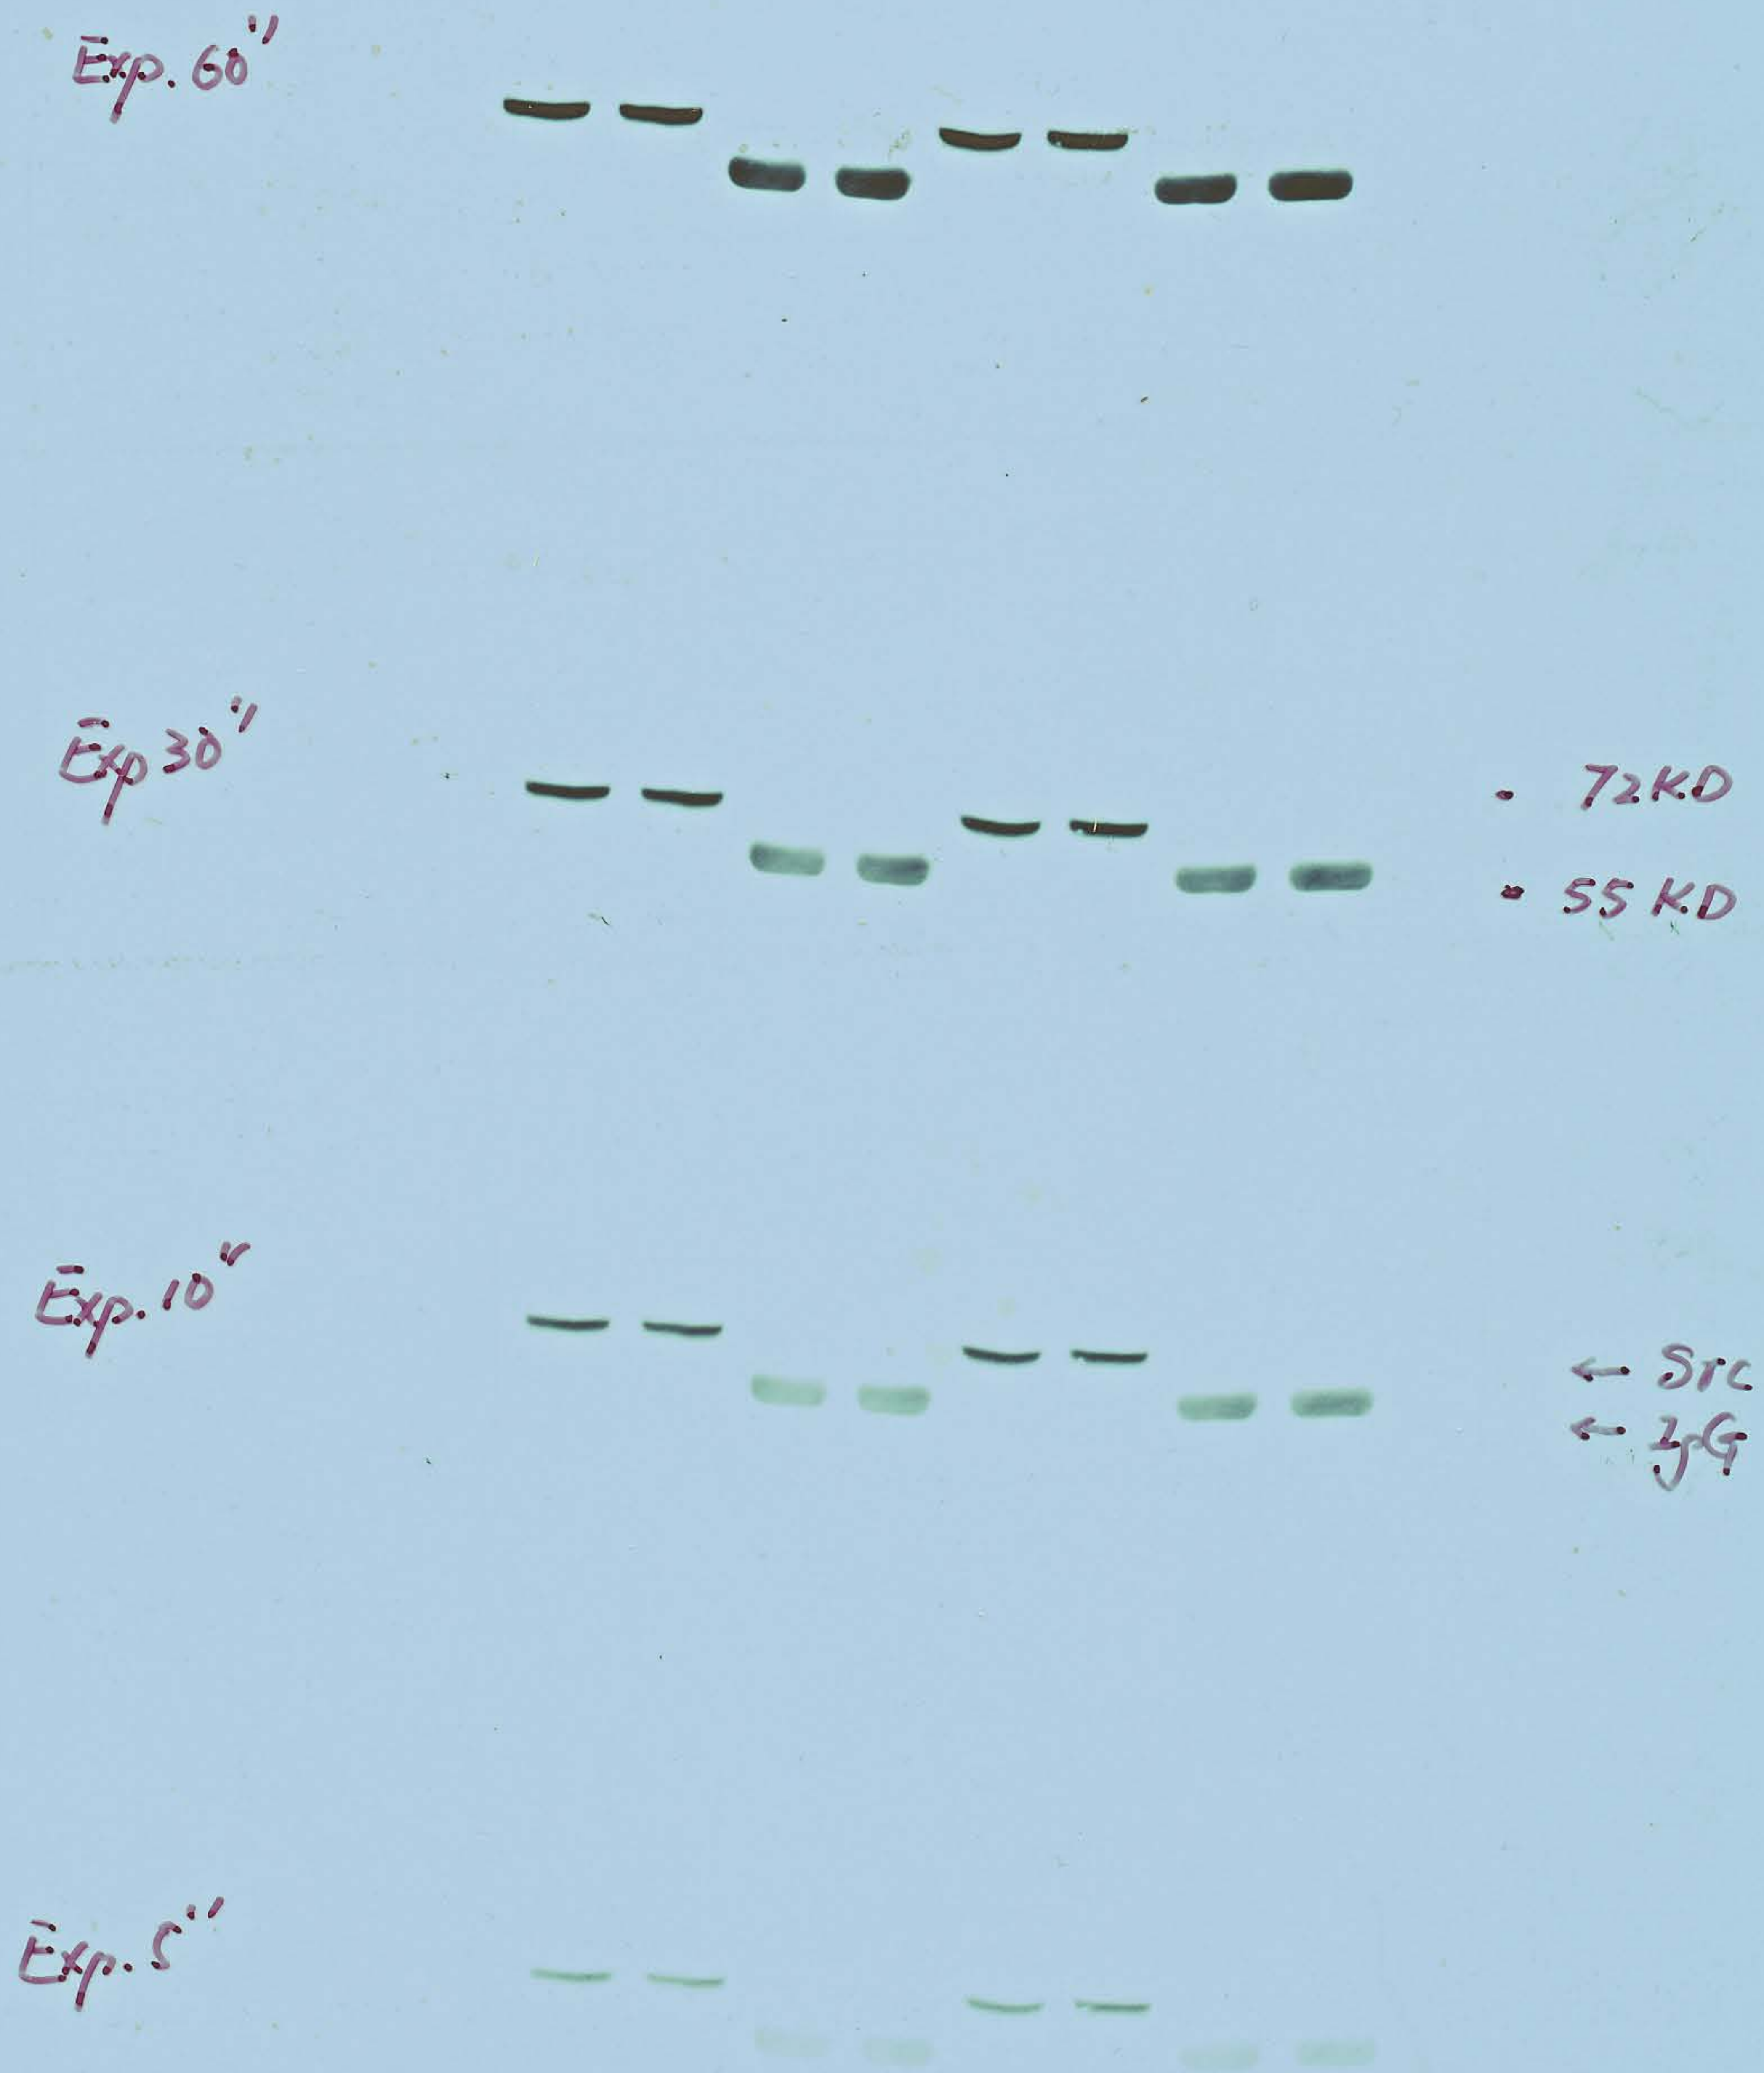



9-24-09, M9/22/09 A

Exp. IP/FYN & WB ; IB/FYN T/F

Fig3A-3

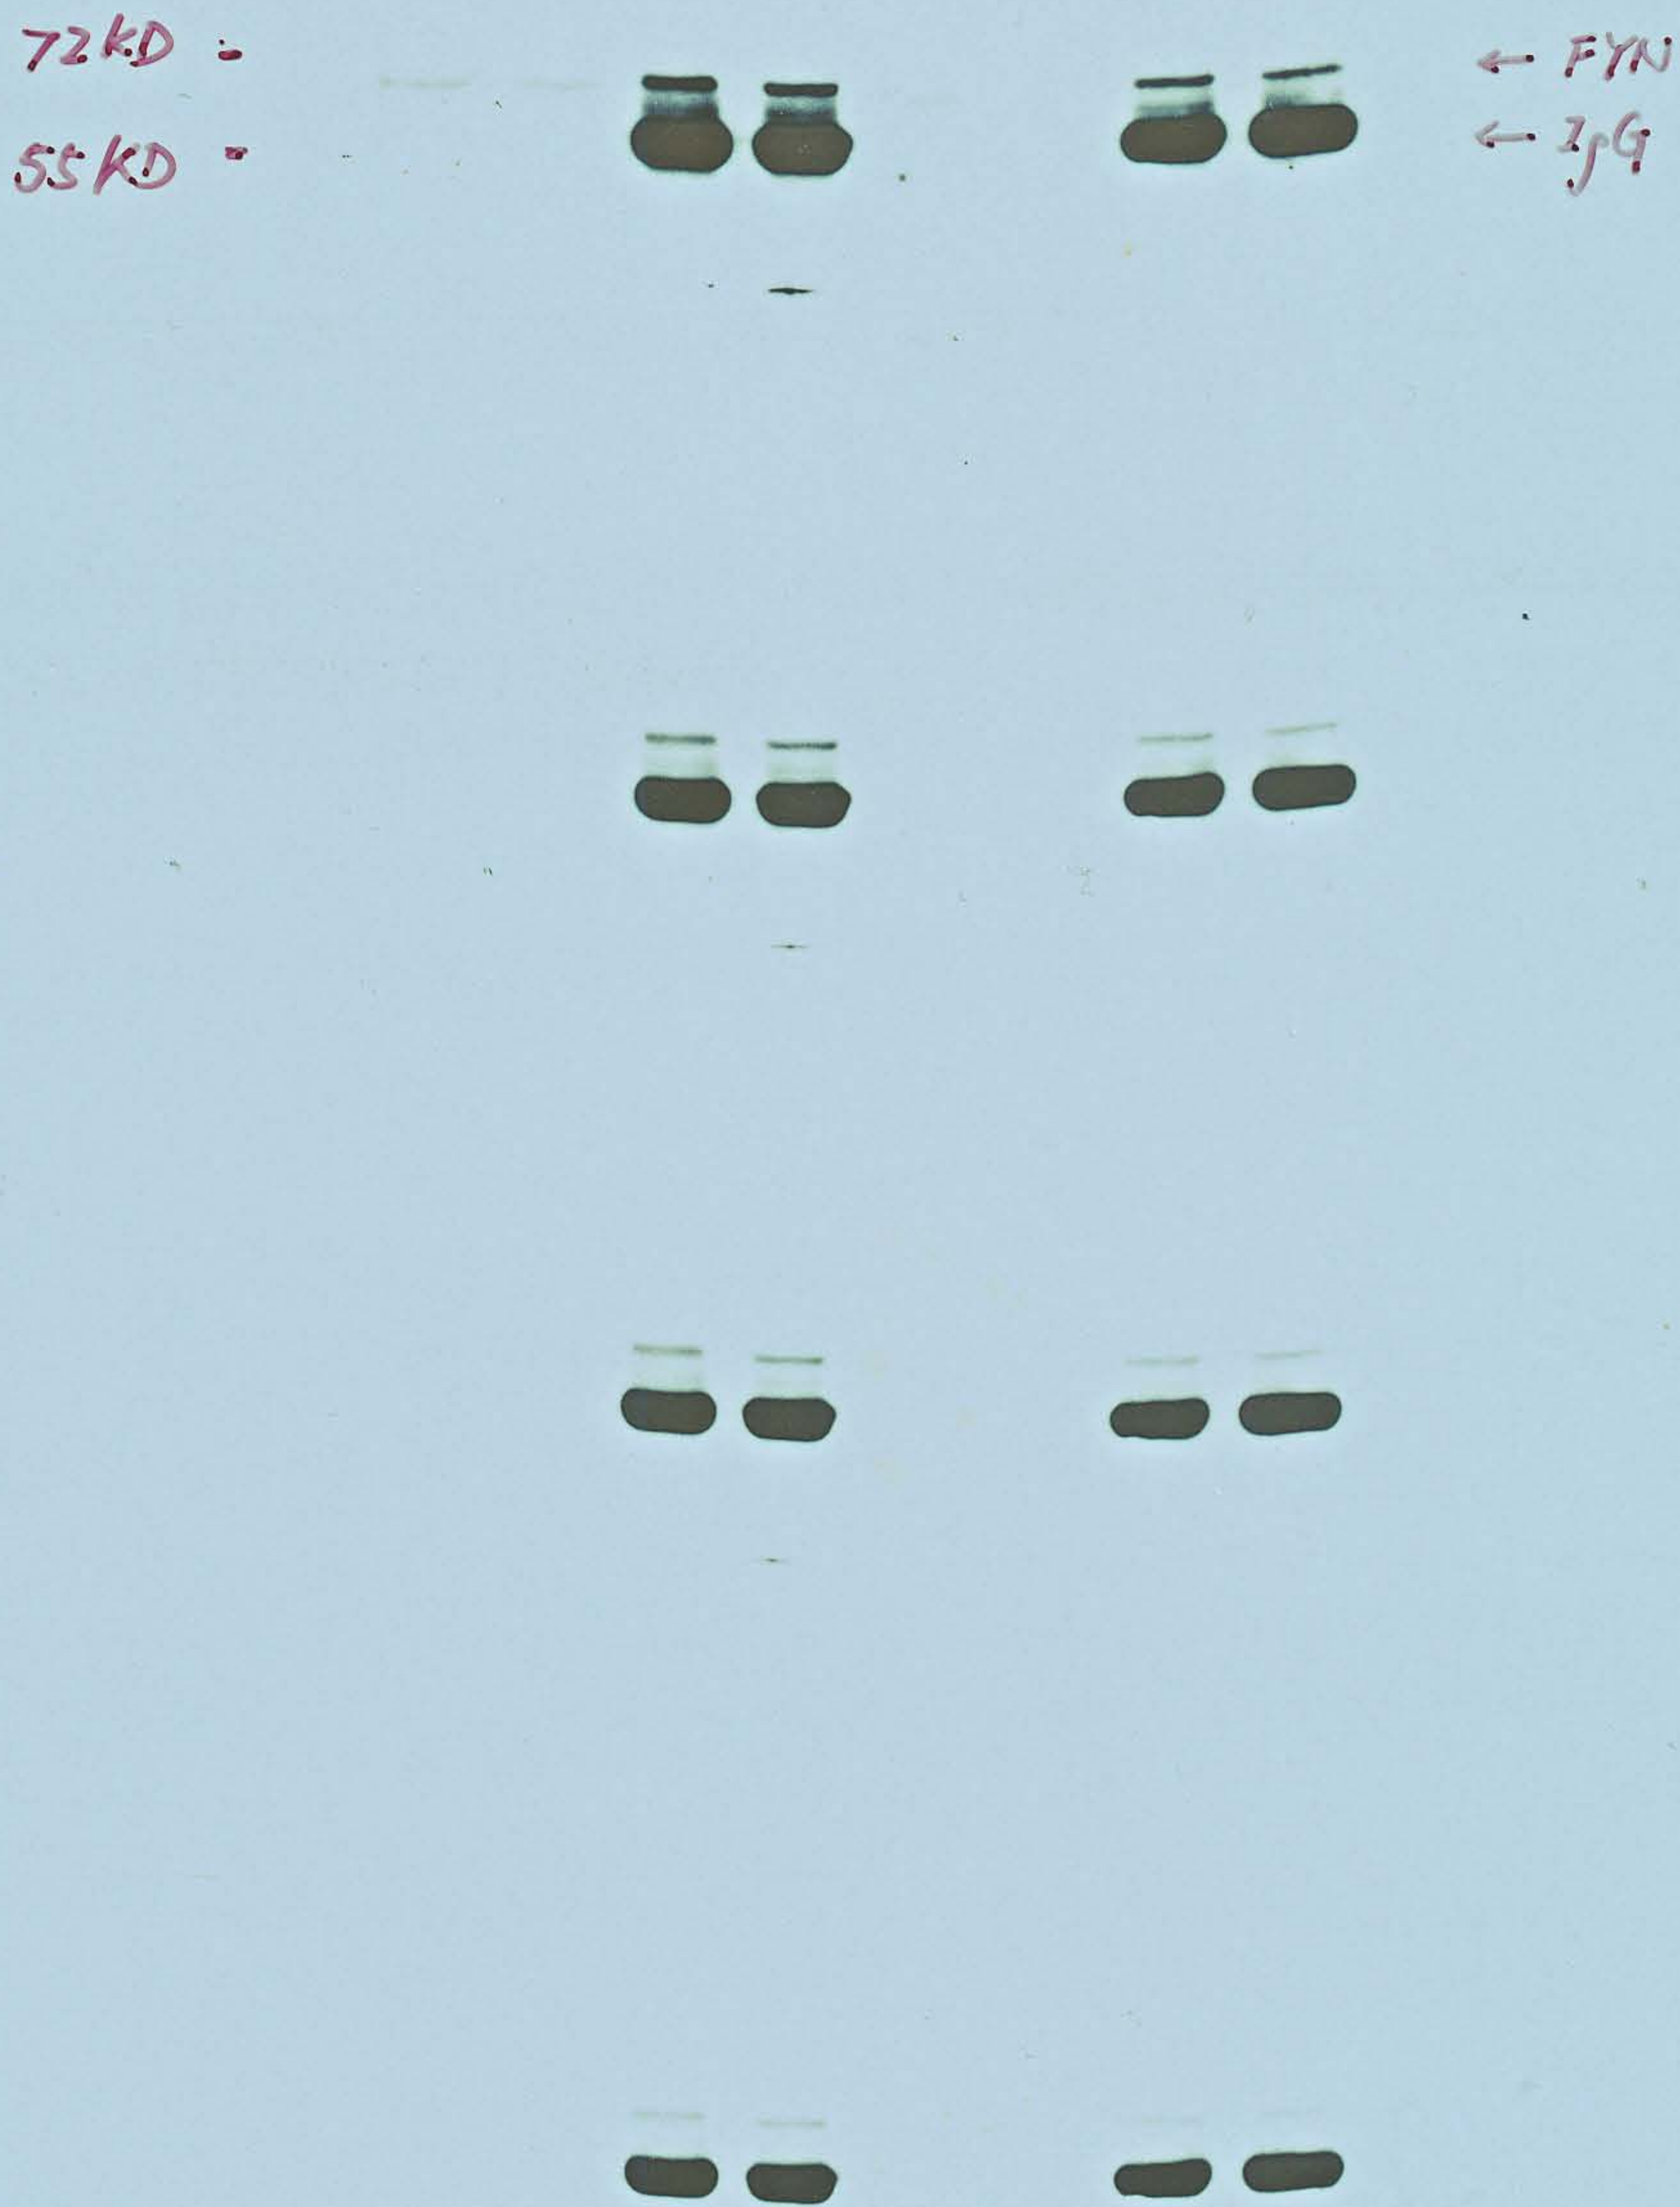



9.2.09 m9/1/09B(BI) & m9/1/09A(AI)

Exps BI: IP/NR2A, IB/4G10; AI: WB/4G10  
-/- -/-

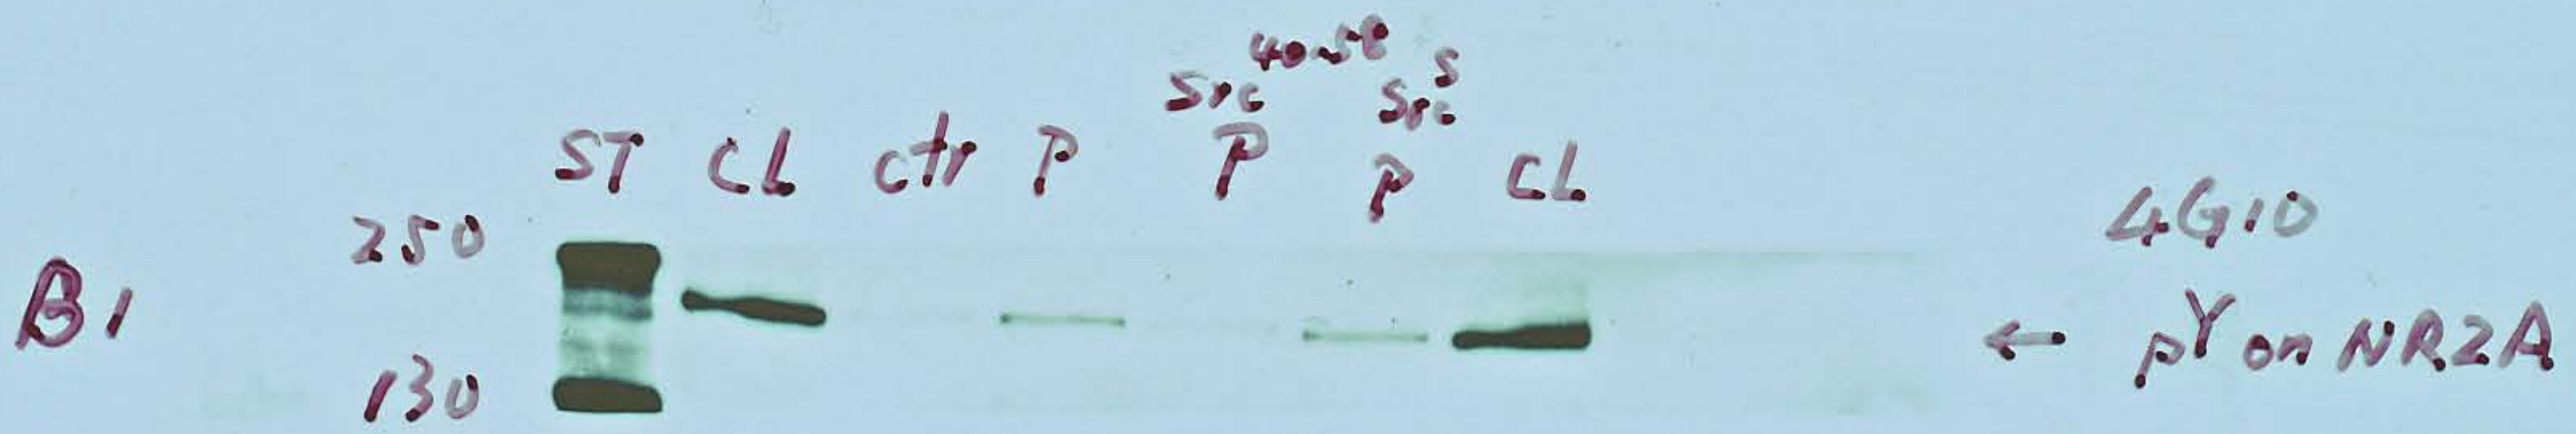

Fig3B-1

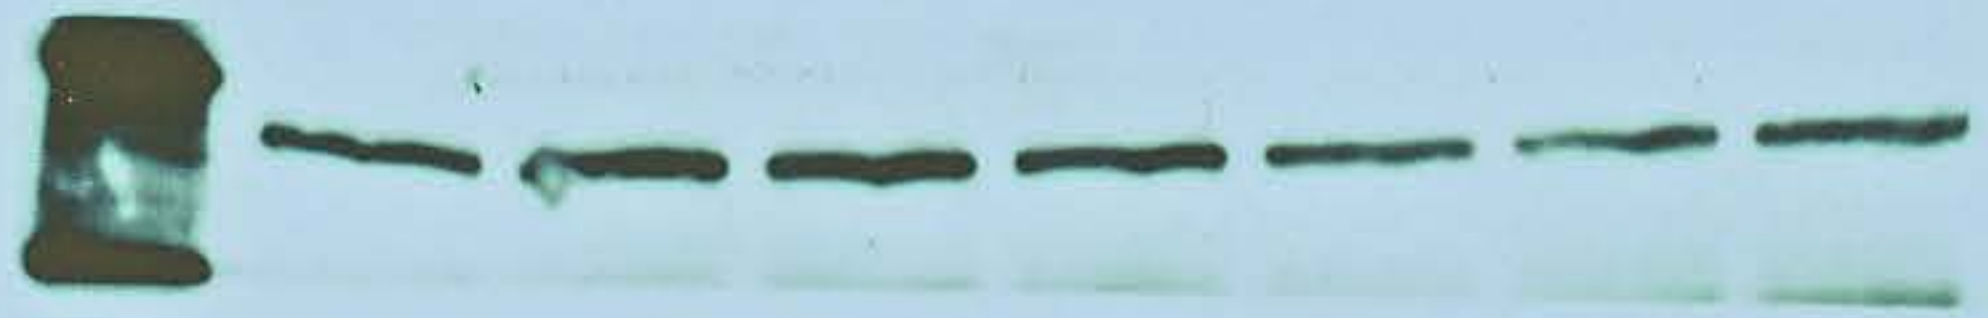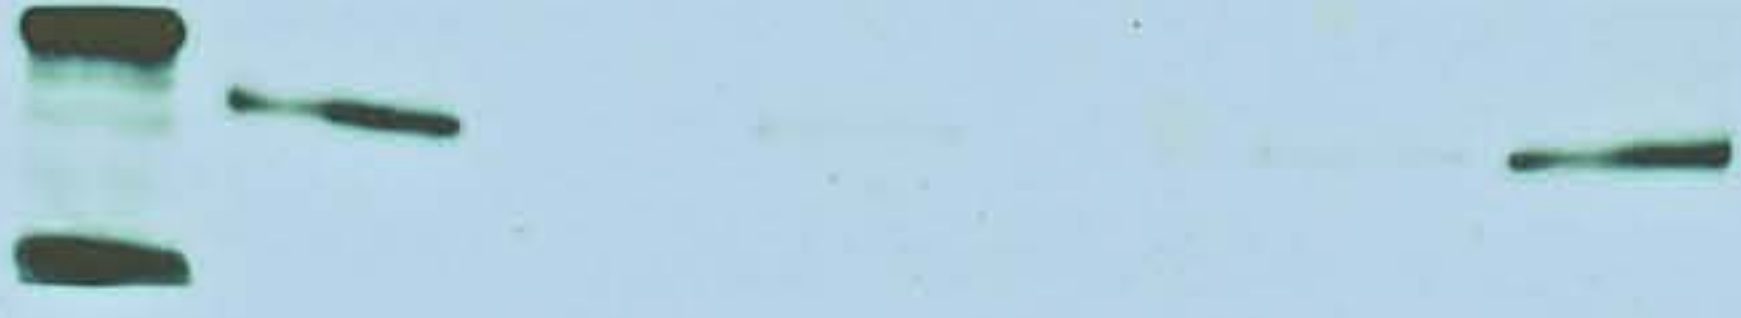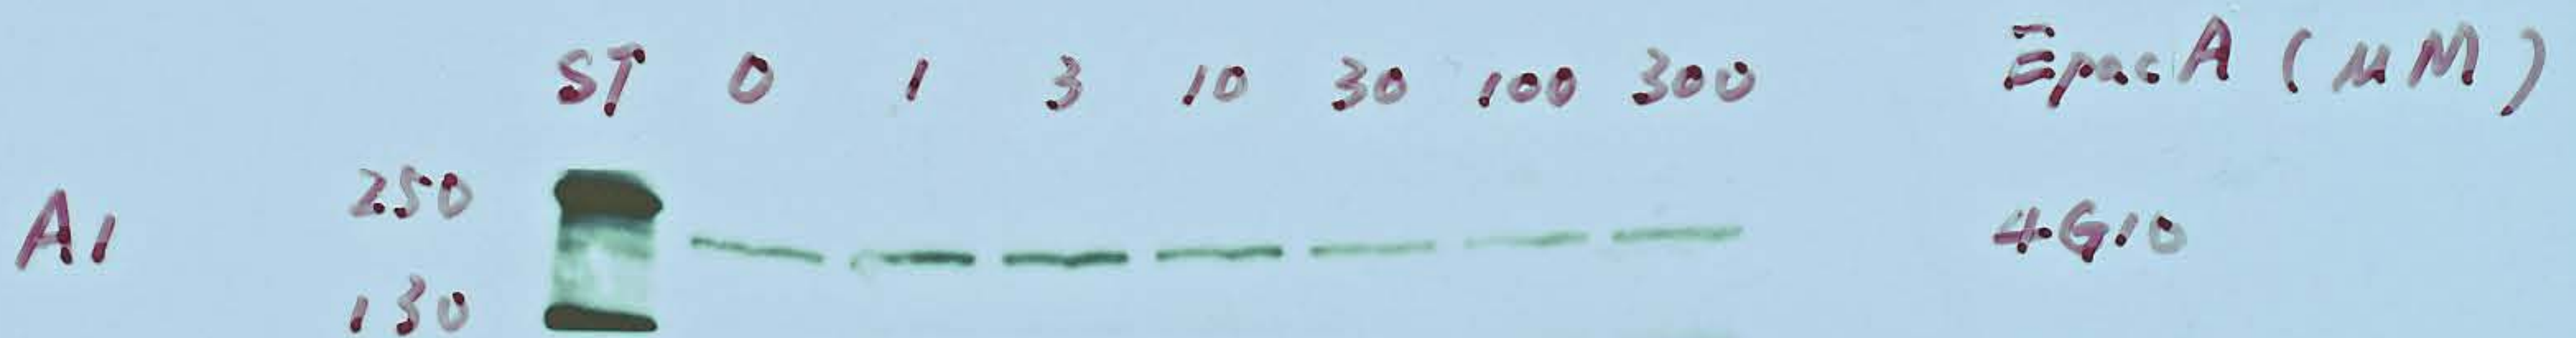



9.3.09. m 9/1109 B (B.) T/H

Exp. IP/NR2A, IB/NR2A

Fig3B-2

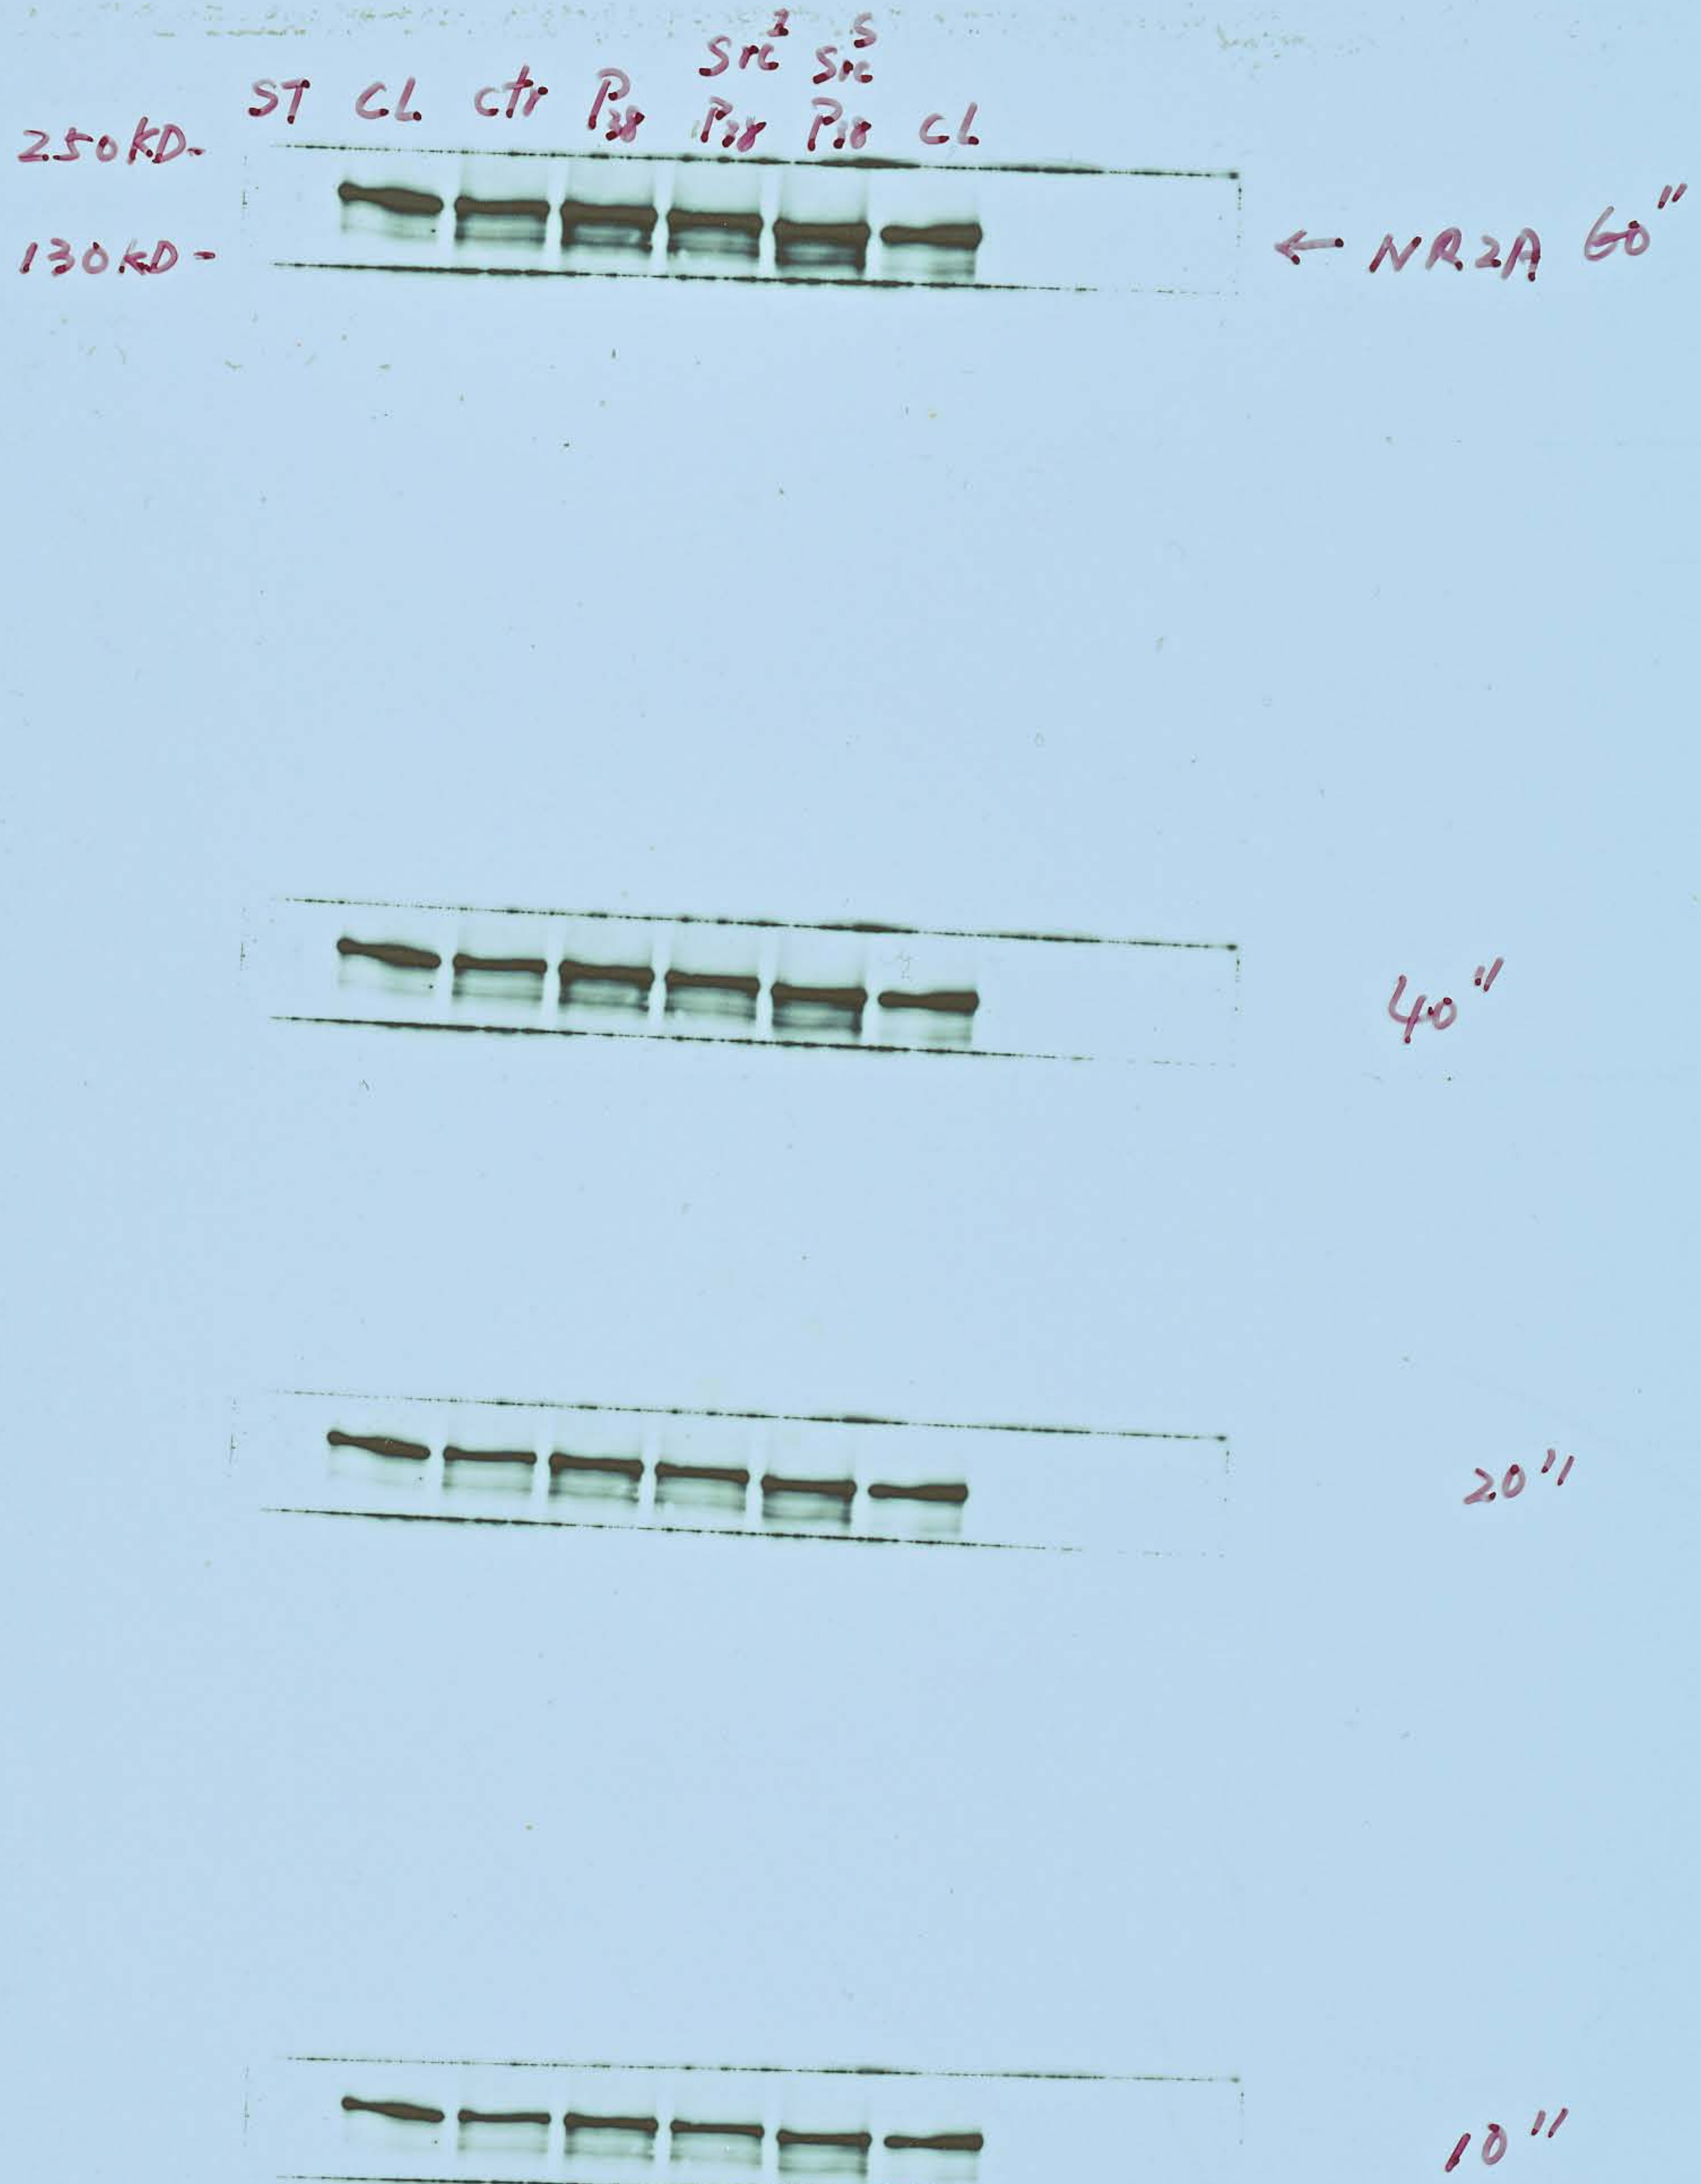



4-2-07 (m4/2A & m4/2B)

IP: NR2A; 2B: 4G10  
NR2B

Fig3B-3

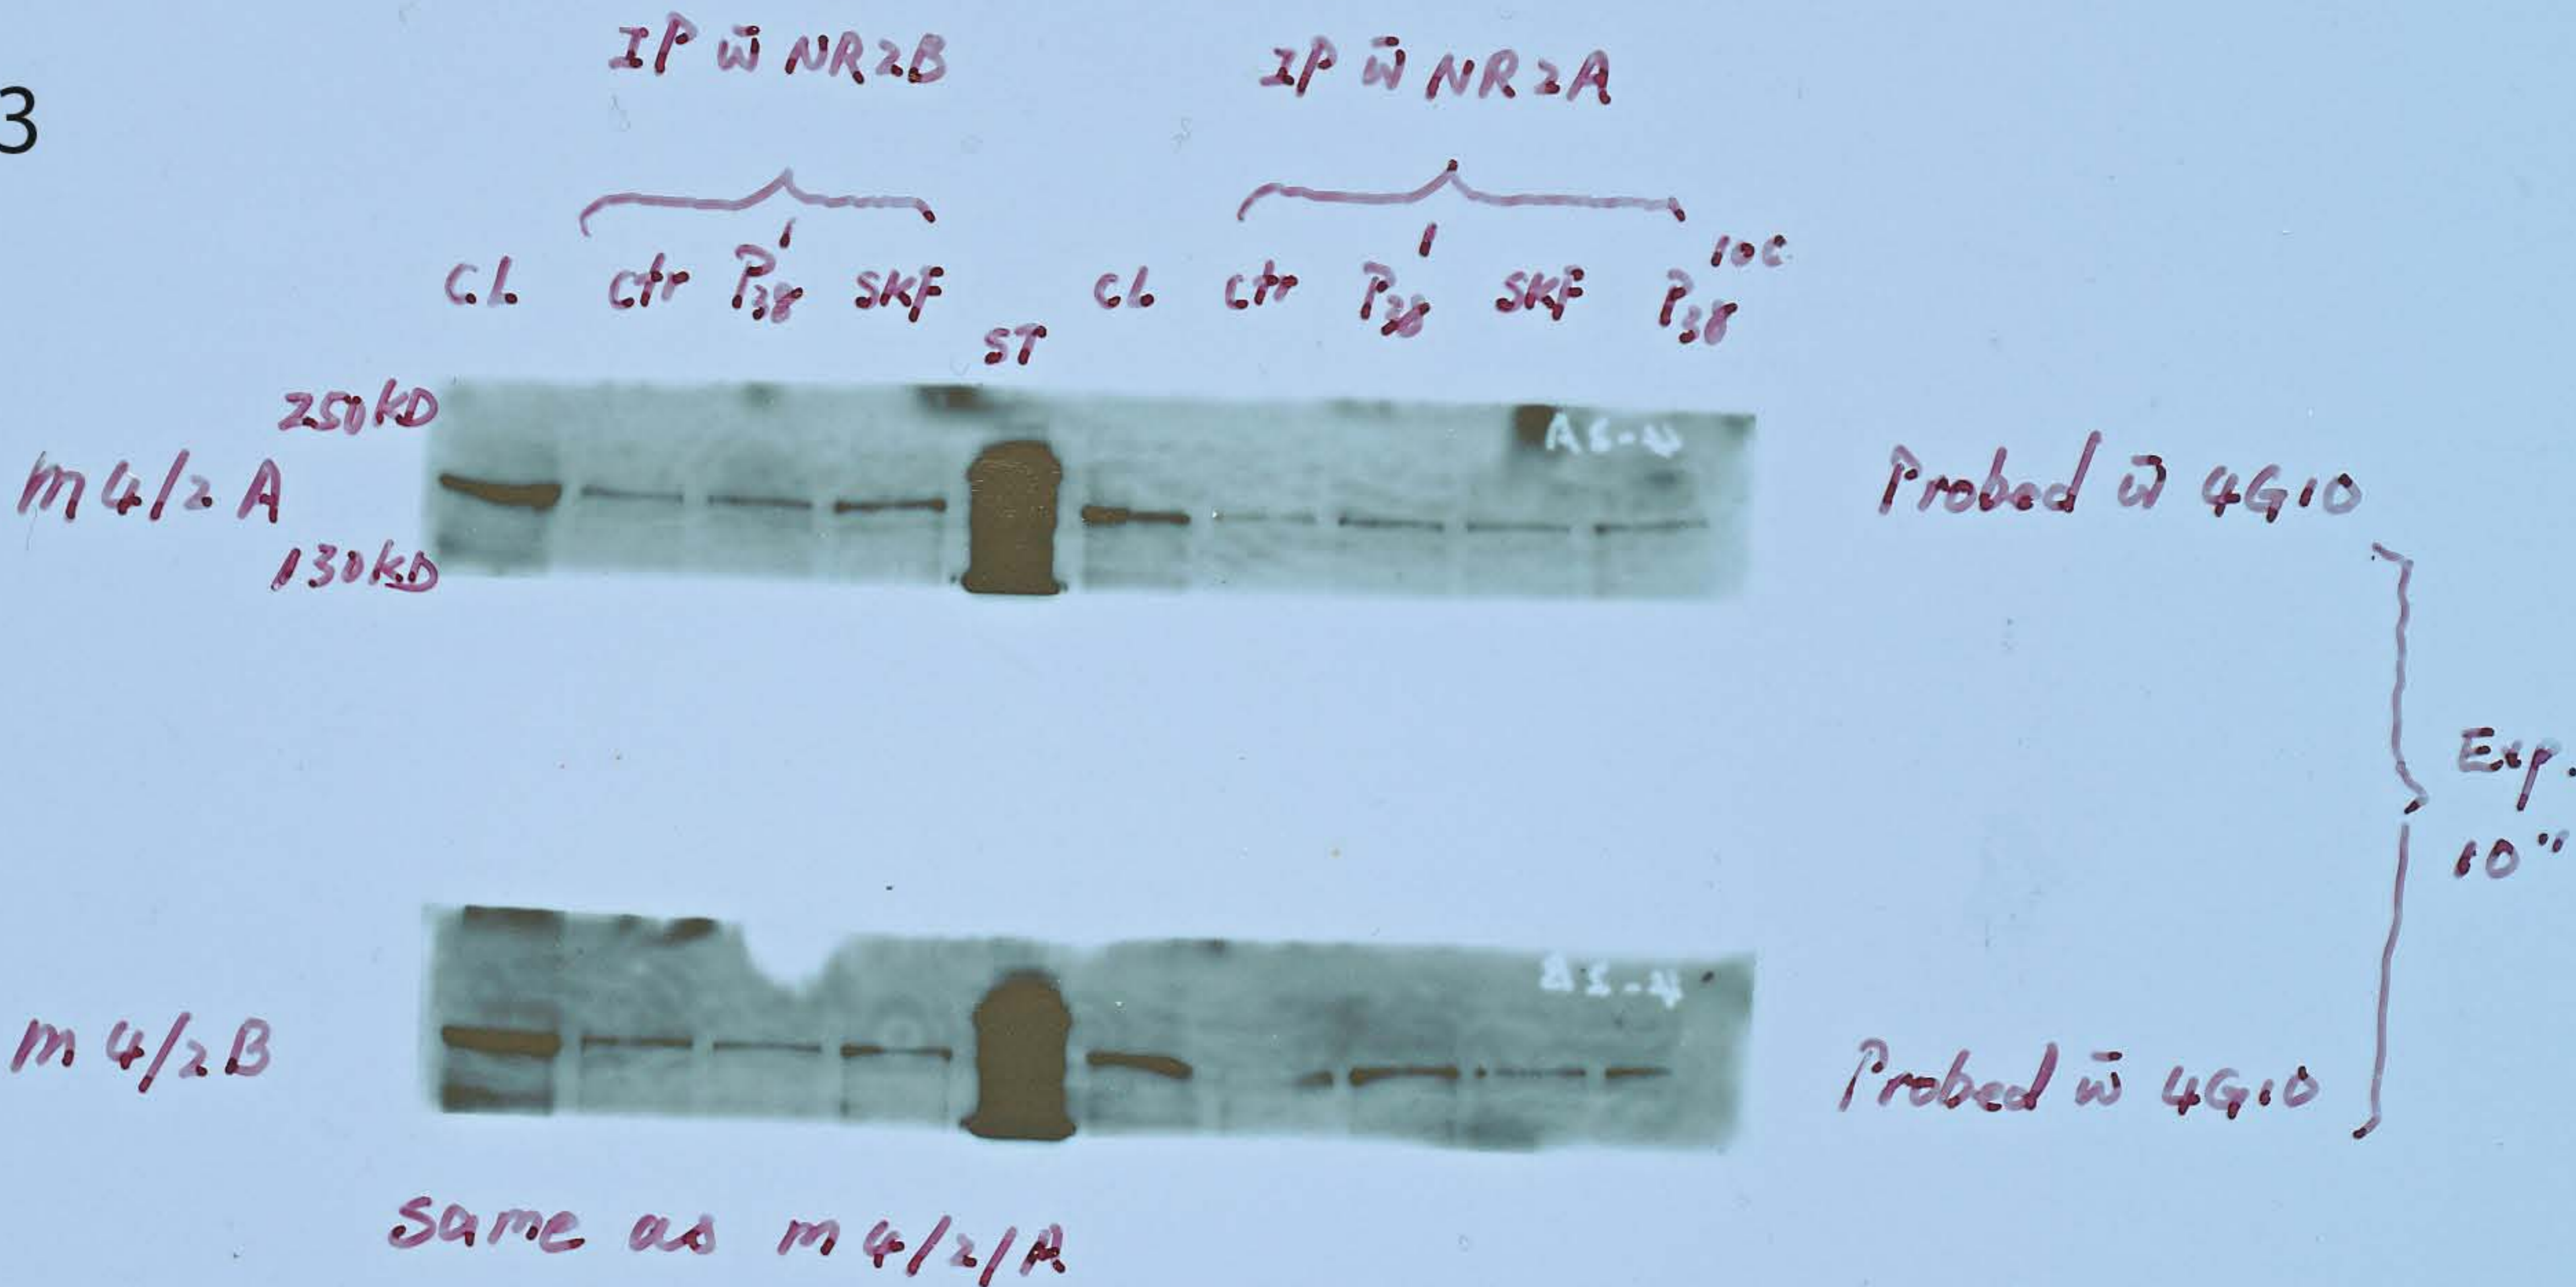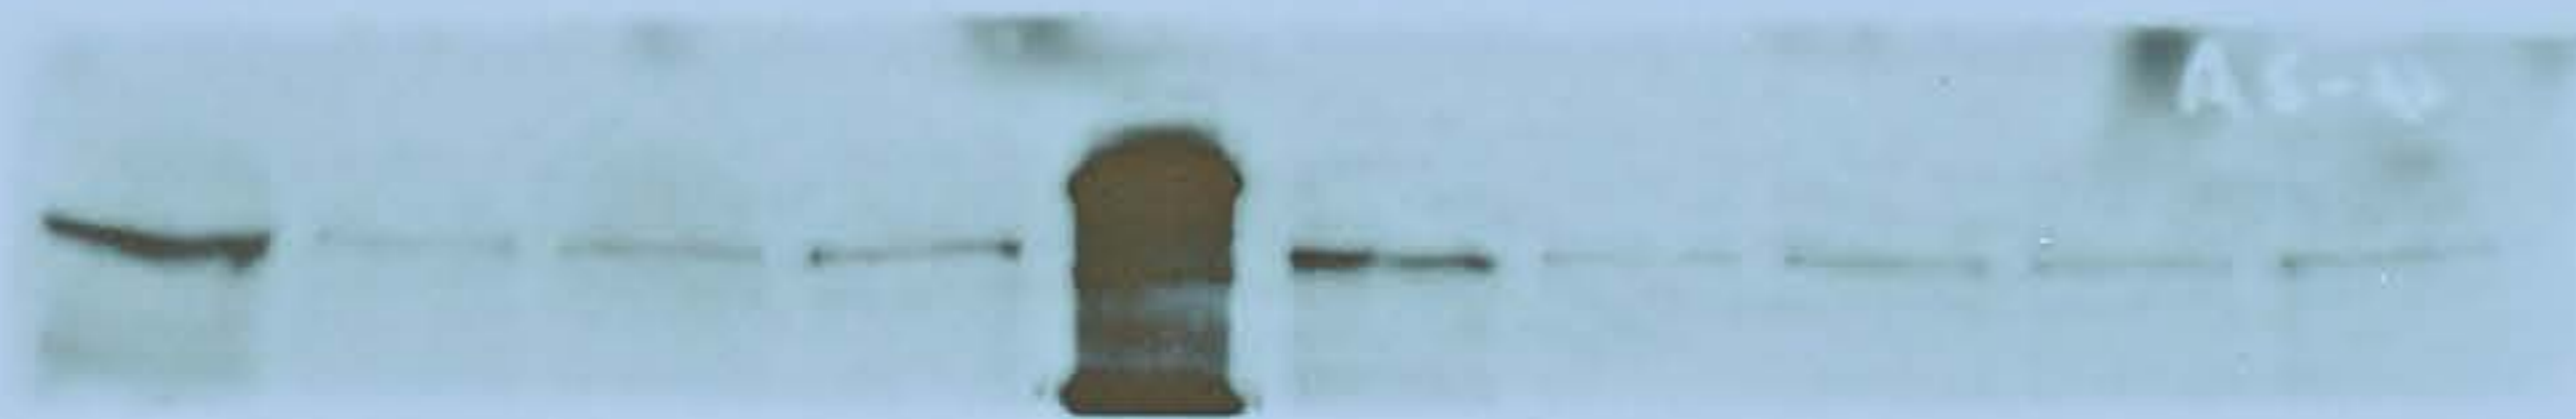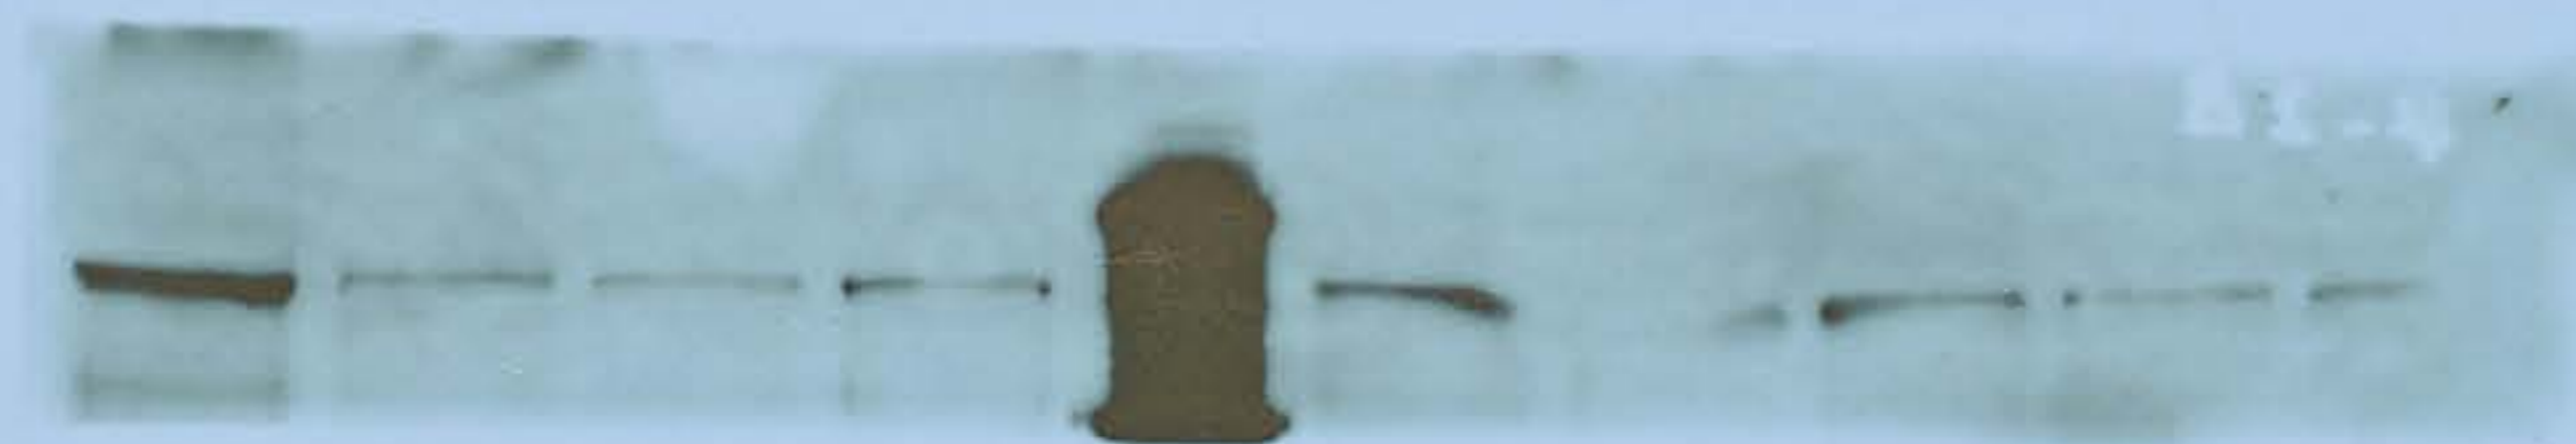

Exp. 5



4.3.09 (m4/2A & m4/2B)

IP: NR2B, IB: NR2B

Fig3B-4

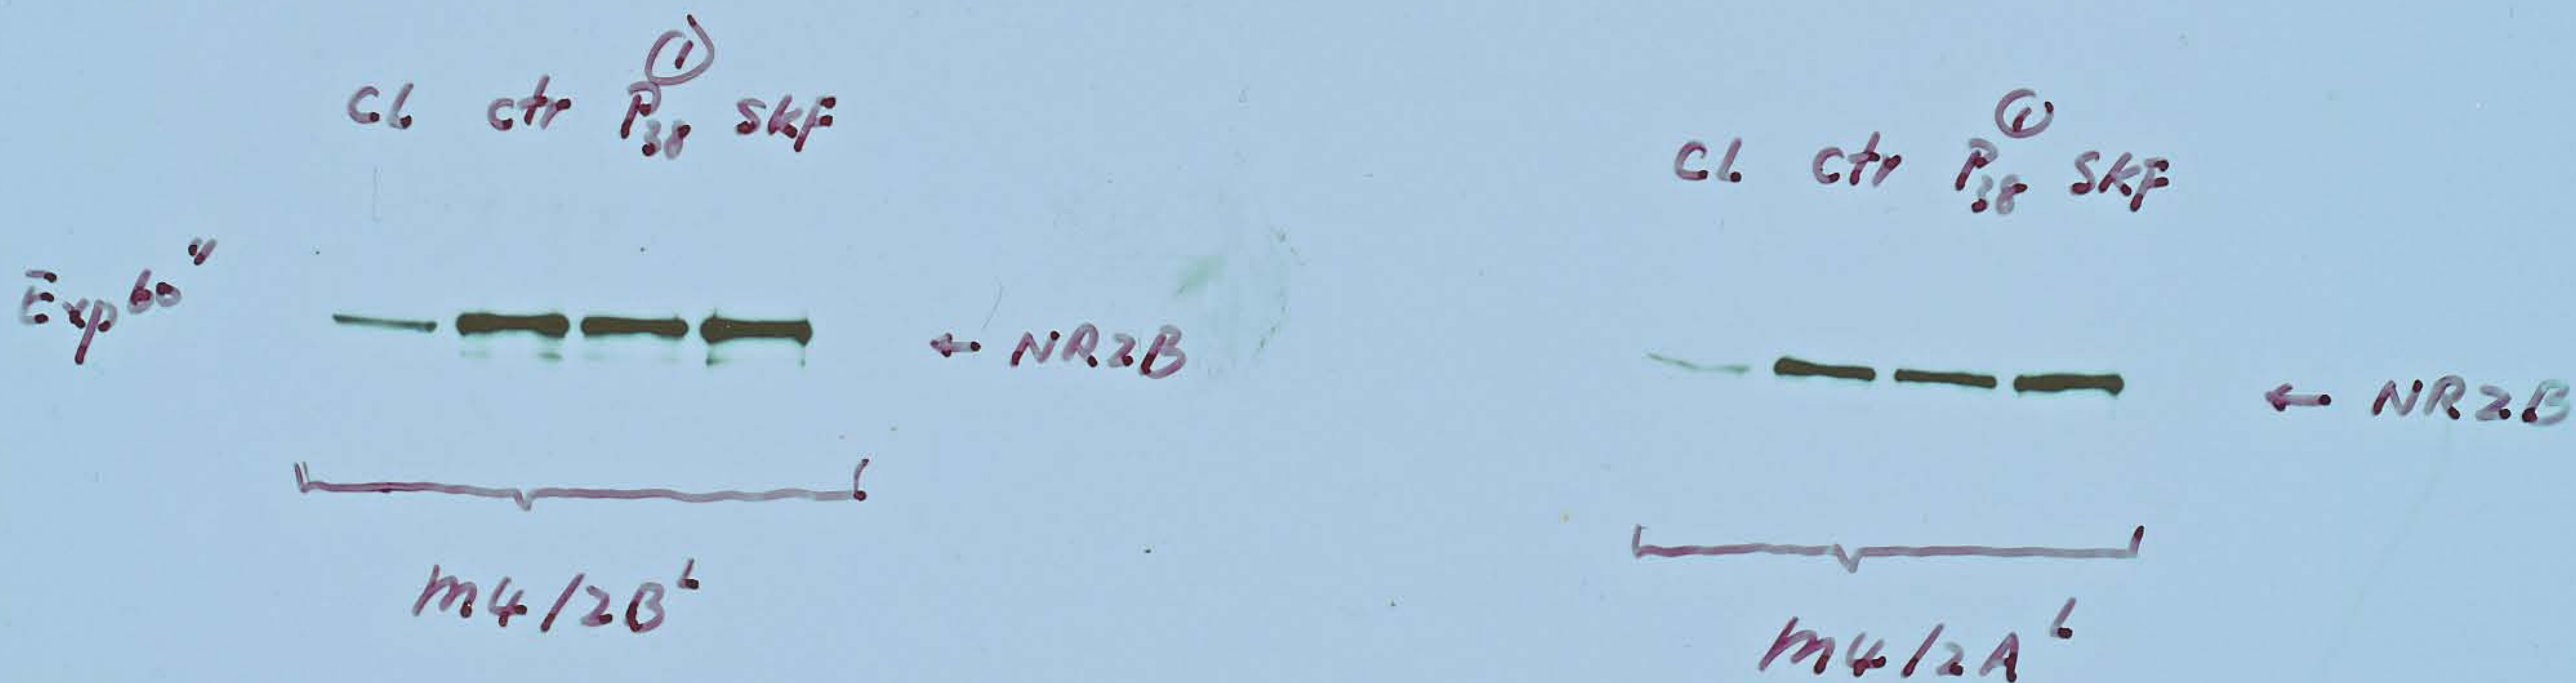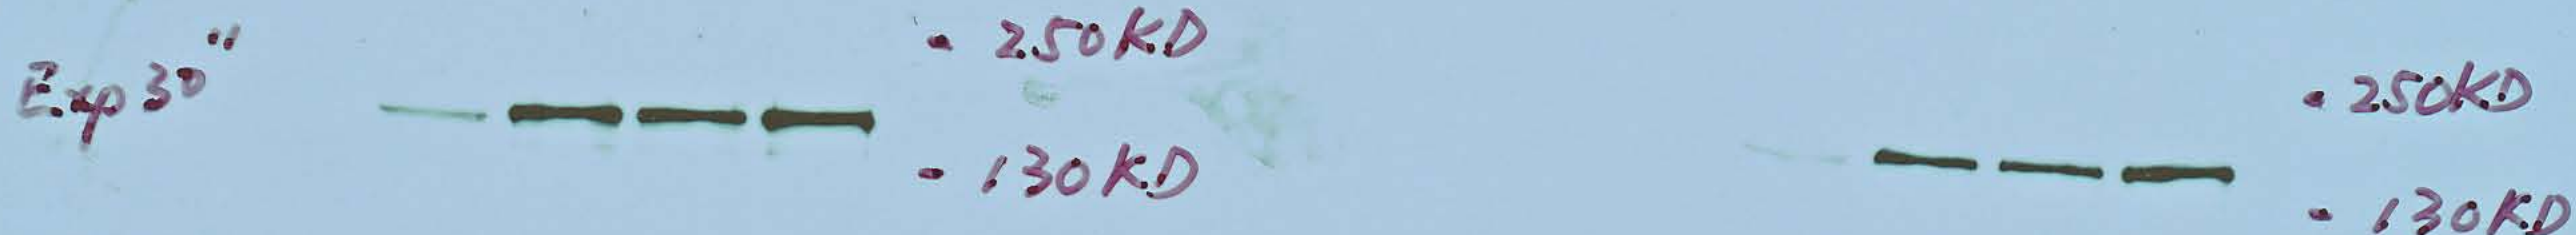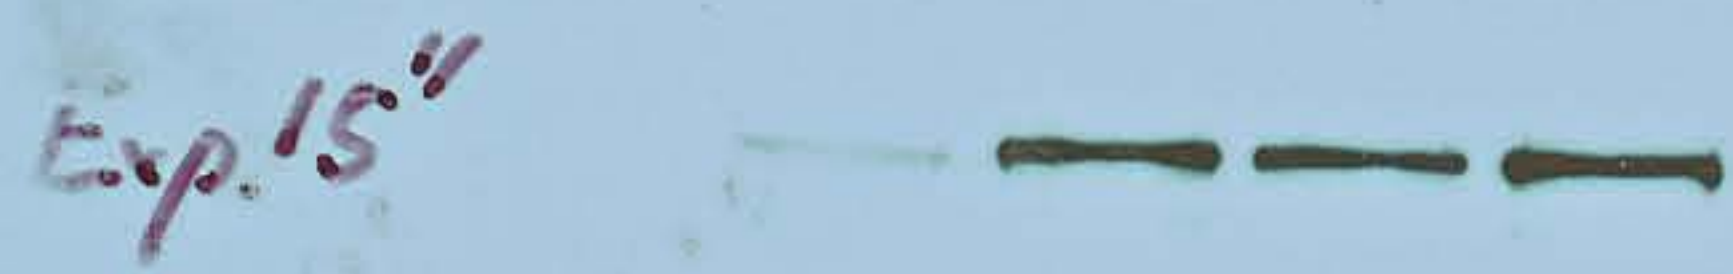



S127109, mS125A, mS125109B<sup>L</sup>

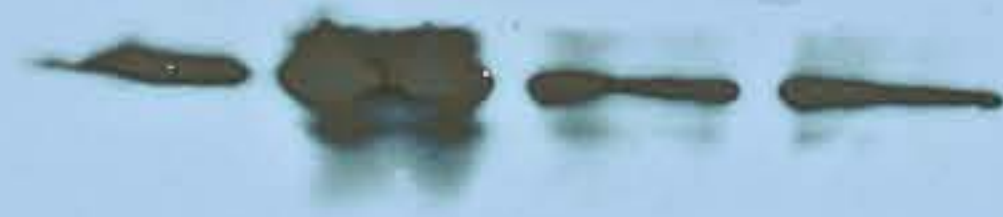

FYI-InPop  
CL ctr skf skf

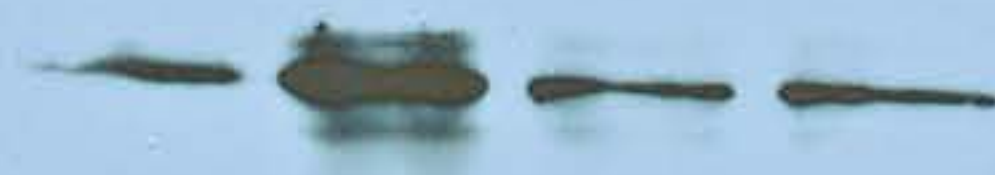

← NR2B

IP NR2B

IB NR2B

mS125109B<sup>L</sup>

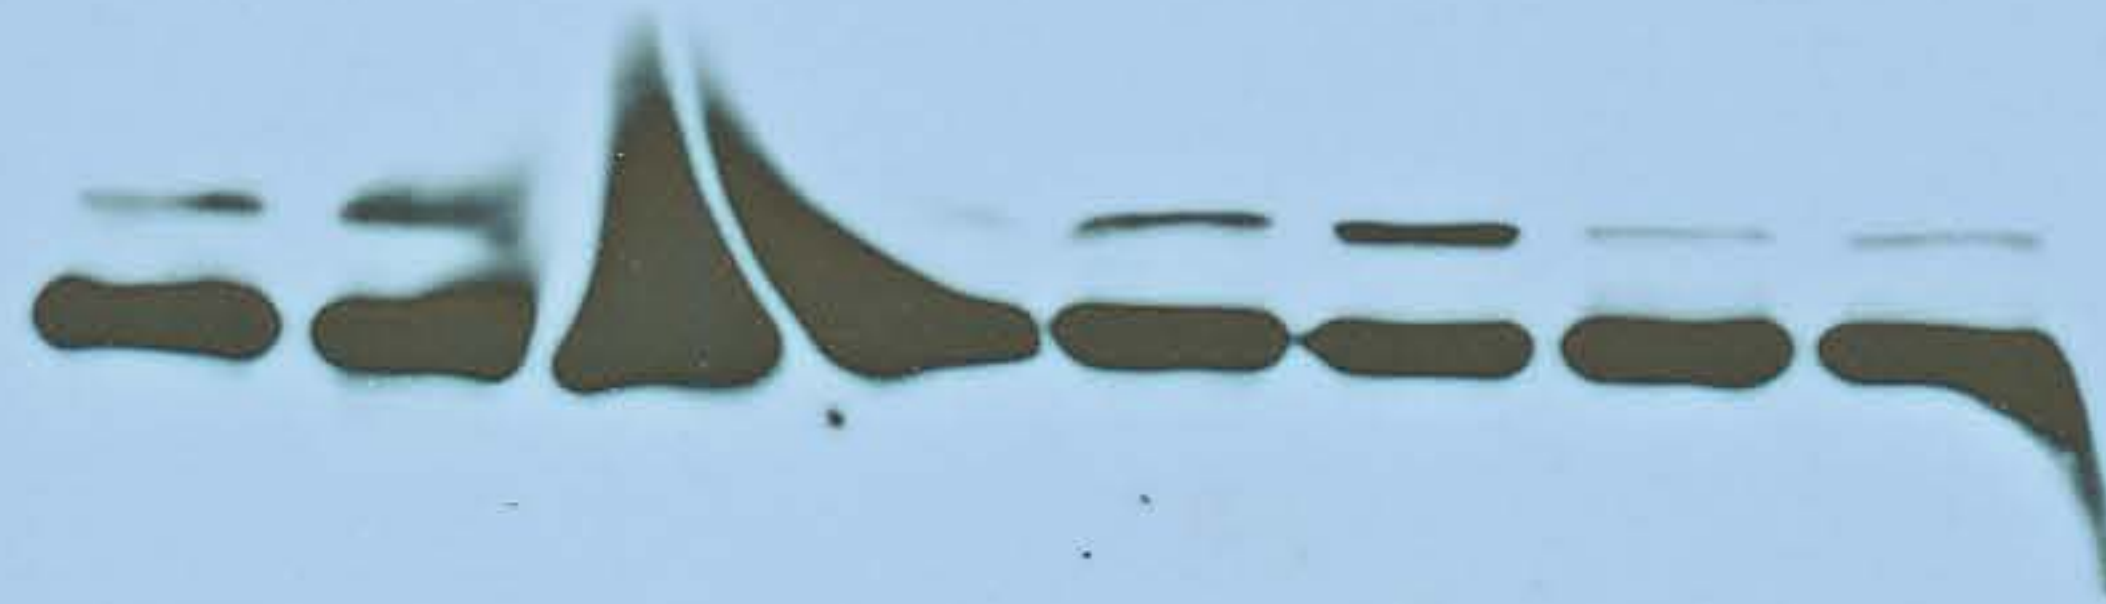

E50''

Fig3C-1

SCH Fyn/Pop  
ctr skf skf skf

72KD -

55KD -

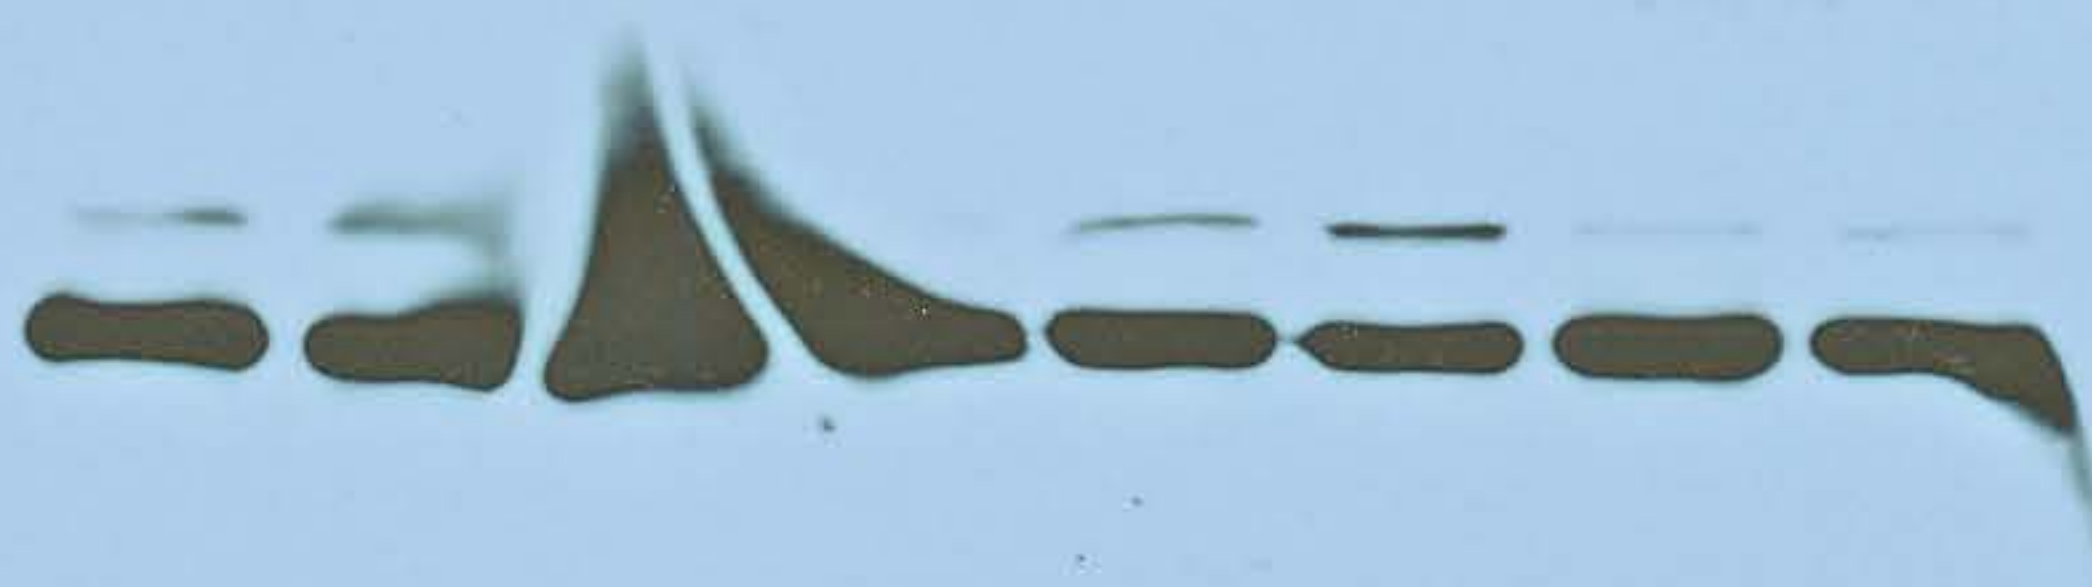

← pFyn<sup>Y420</sup>  
← IgG

IP FYN

IB: pSRC<sup>Y416</sup>

mS125109A

E20''



5/26/09 MS/25/09A

Exp. IP w FYN  
IB w FYN

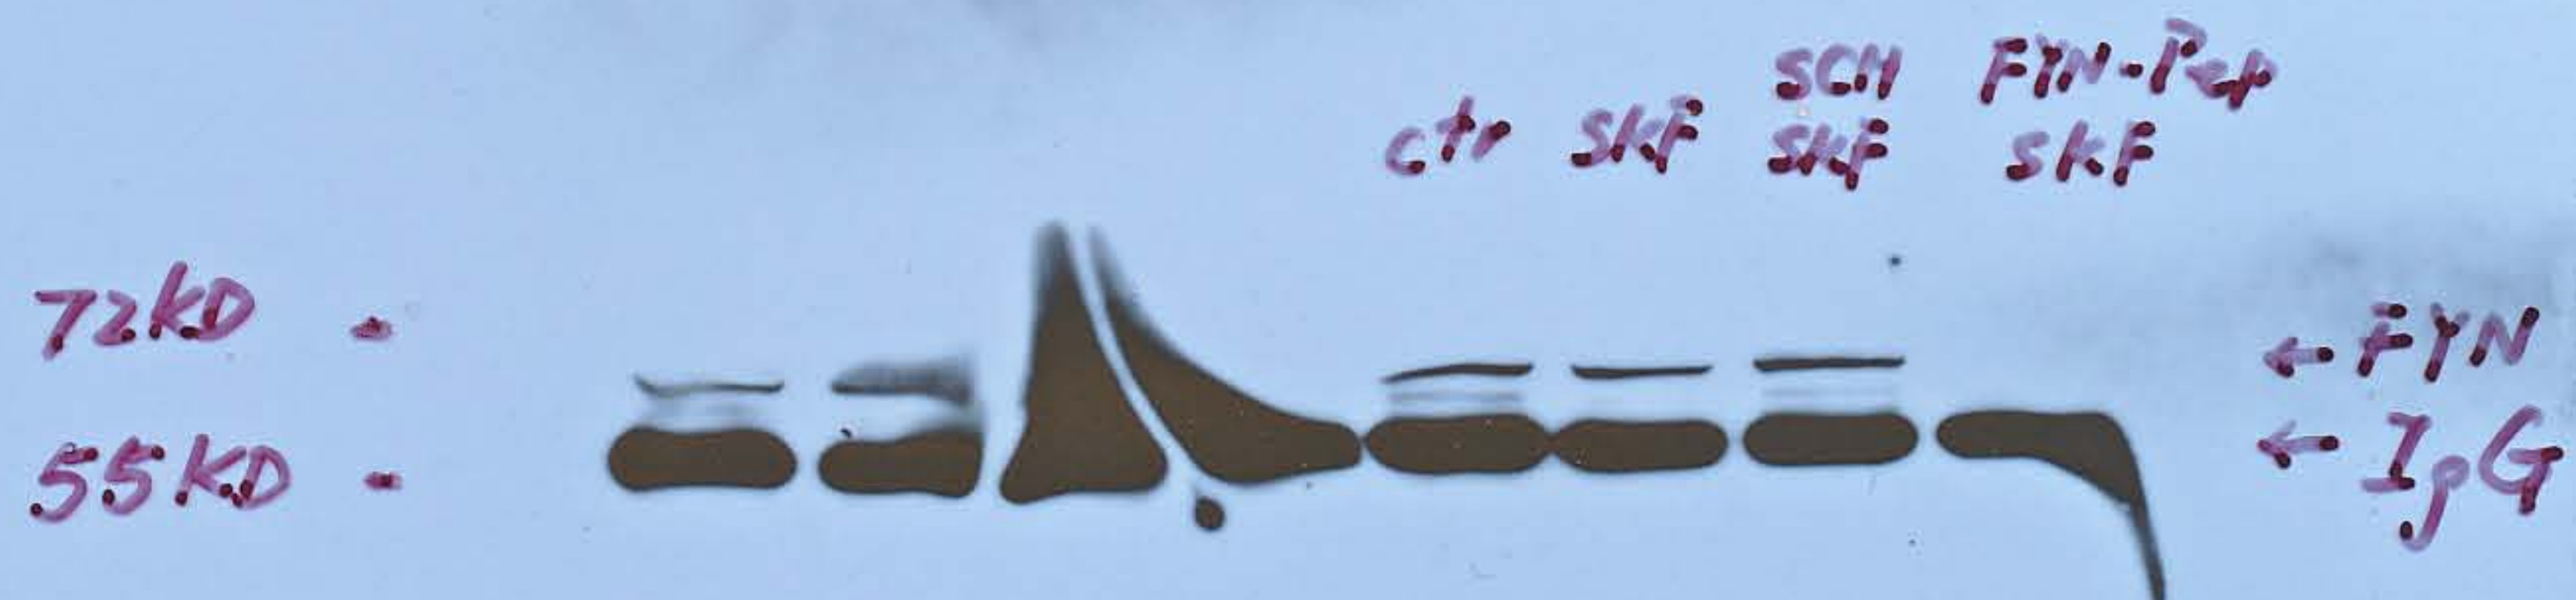

Fig3C-2



4.25.09

M 4/22B, samples: 4/21/09  
Exp. WB, Probed w: pSrc<sup>Y416</sup>

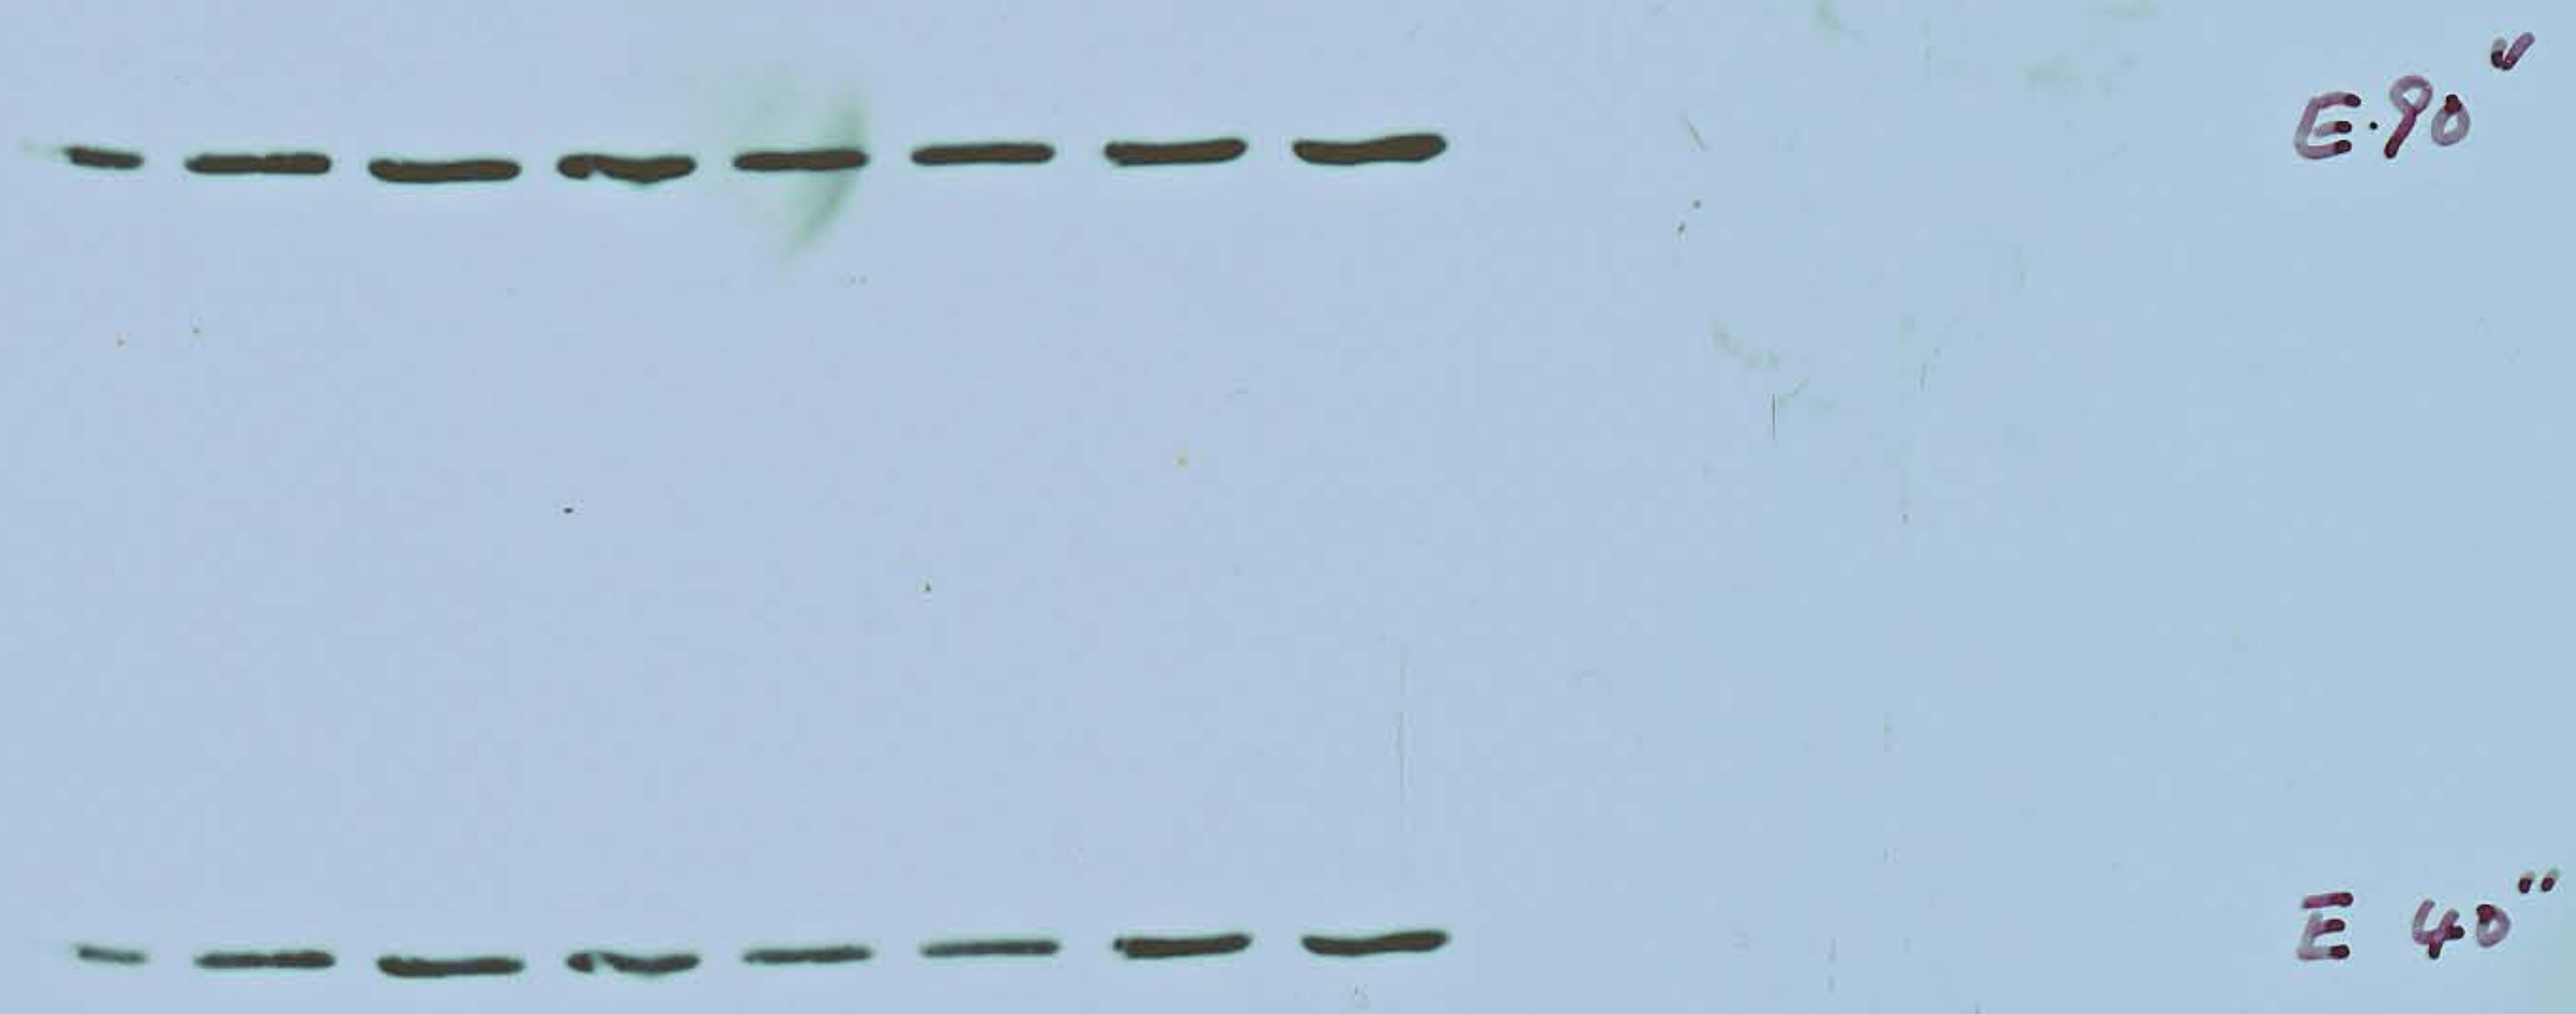

Fig3C-3

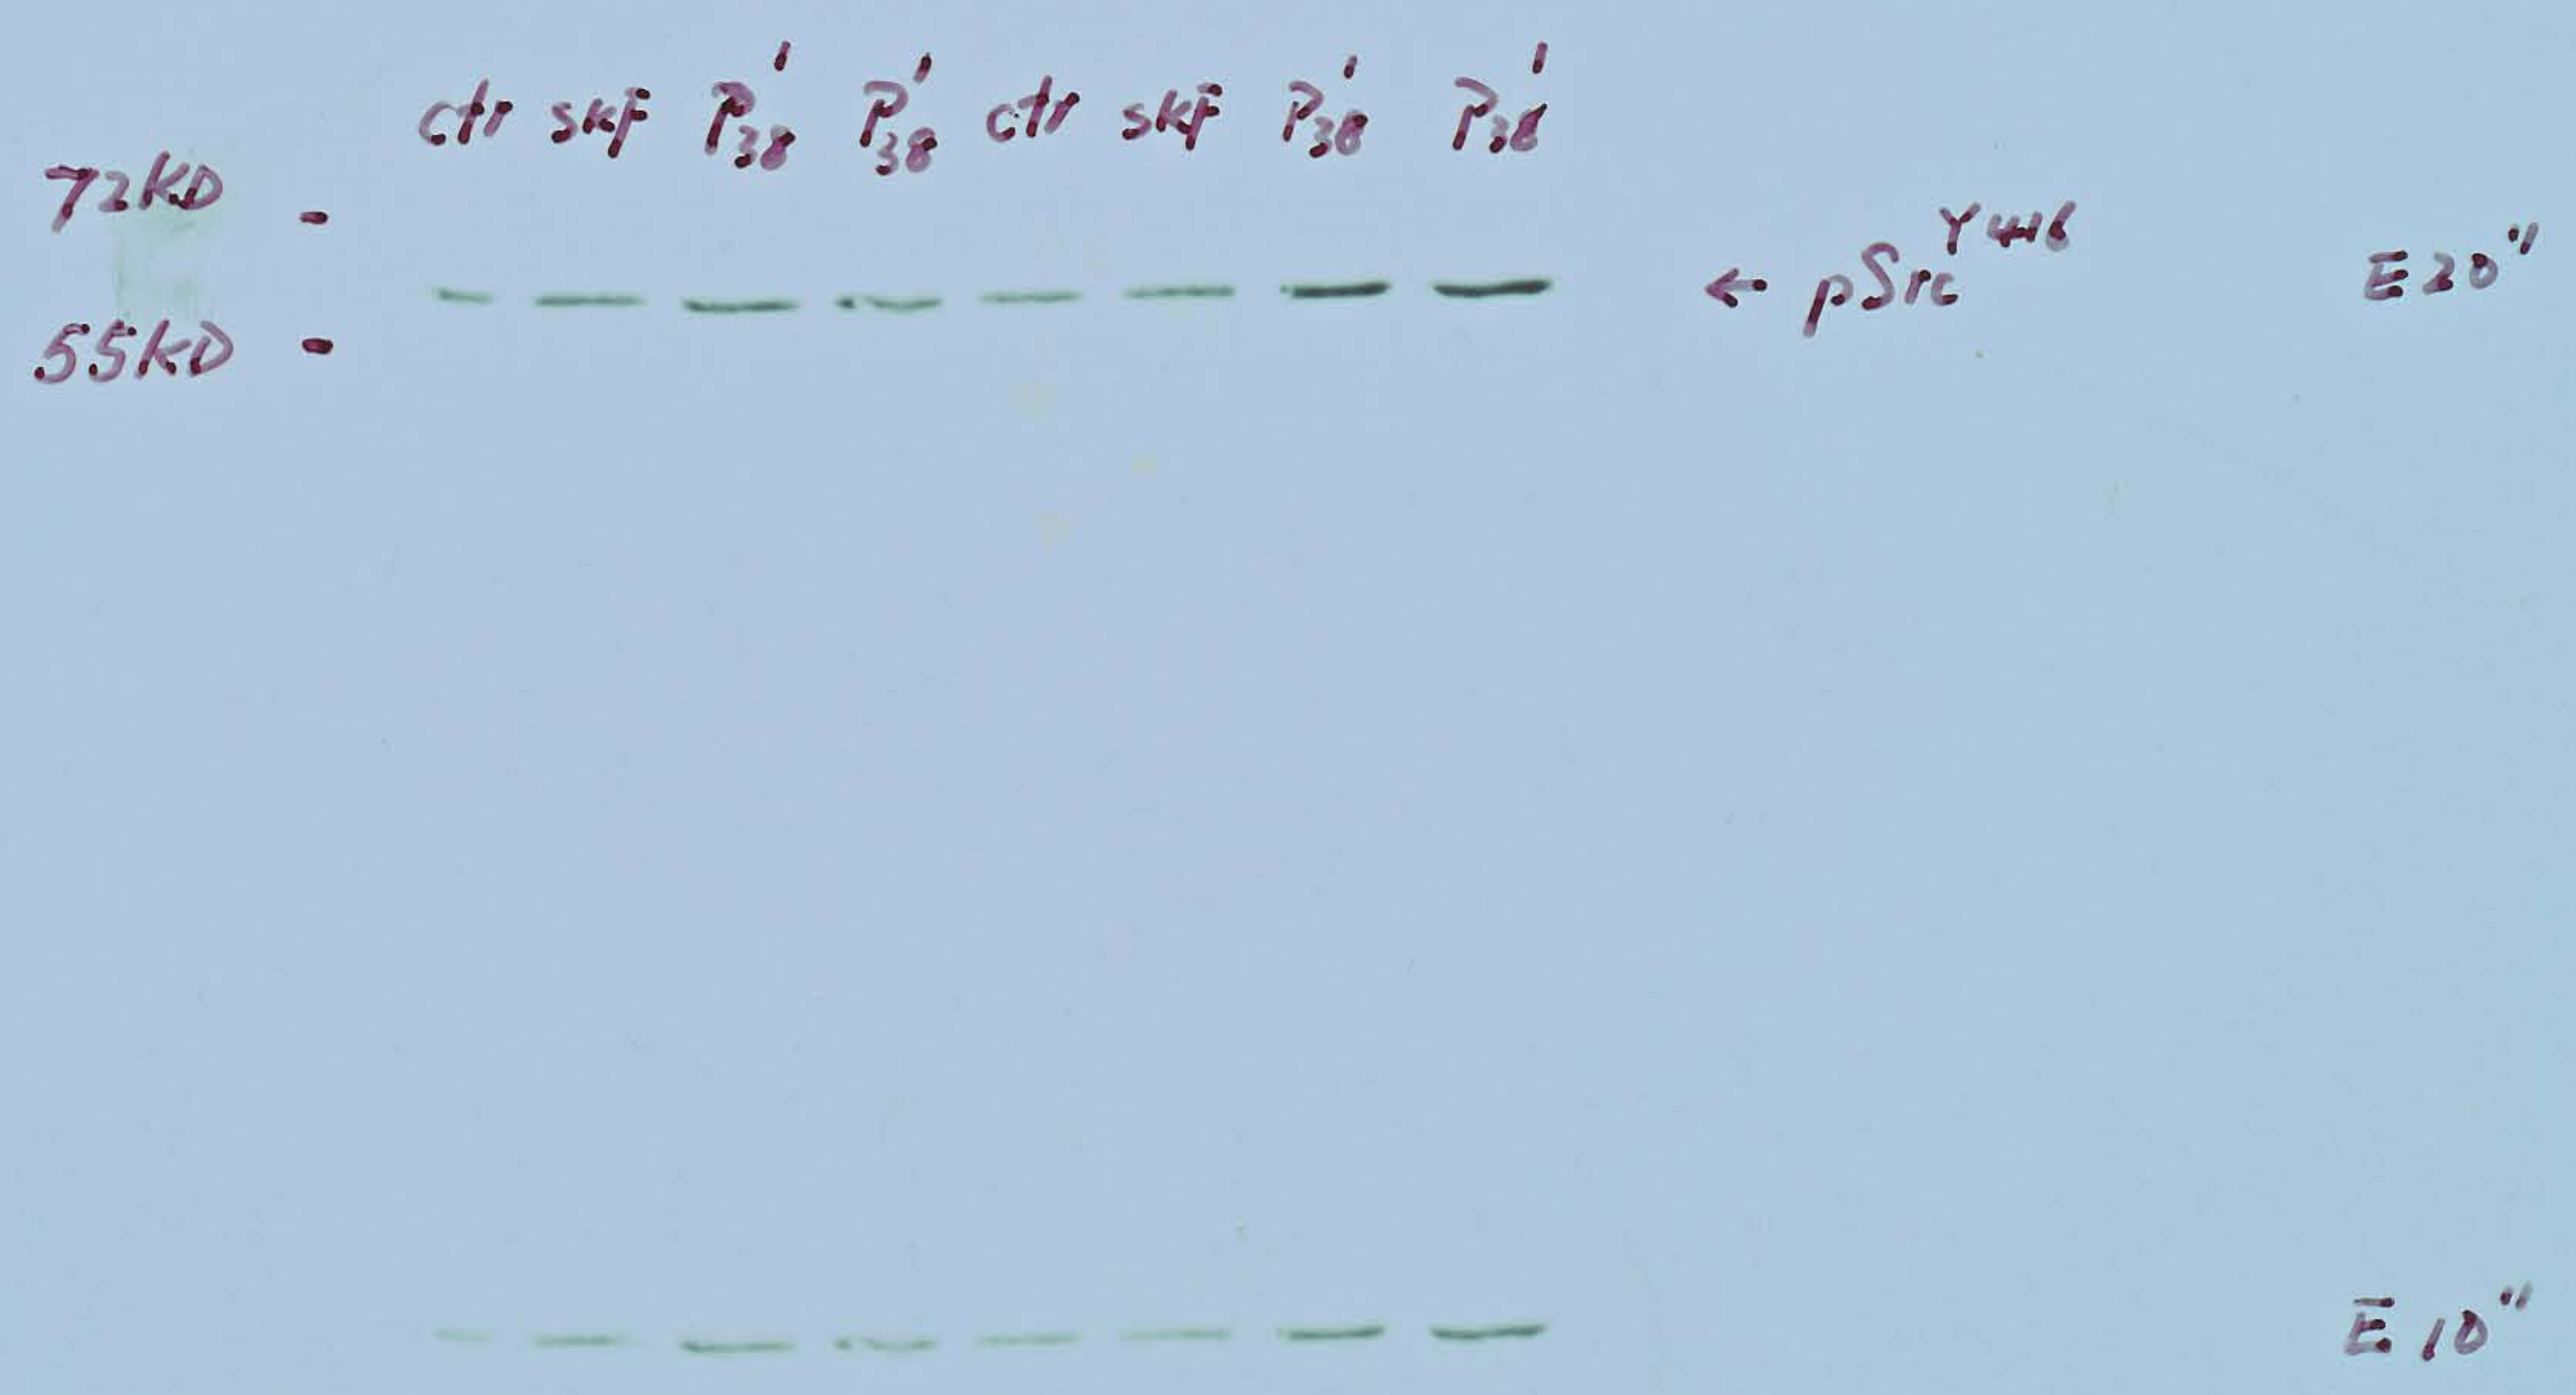



4-24-09

m 4/22B, sample - 4121109

Exp. WB; Ab. Total Src

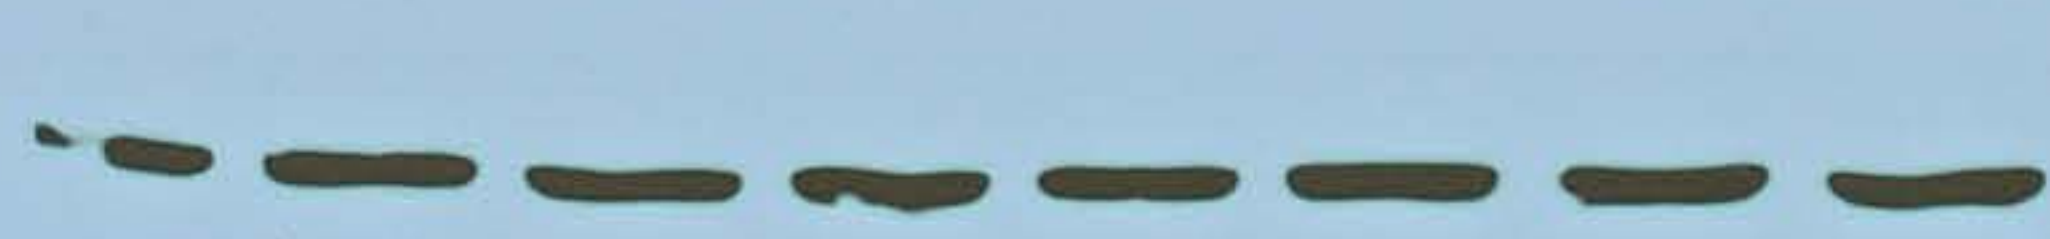

E 90"

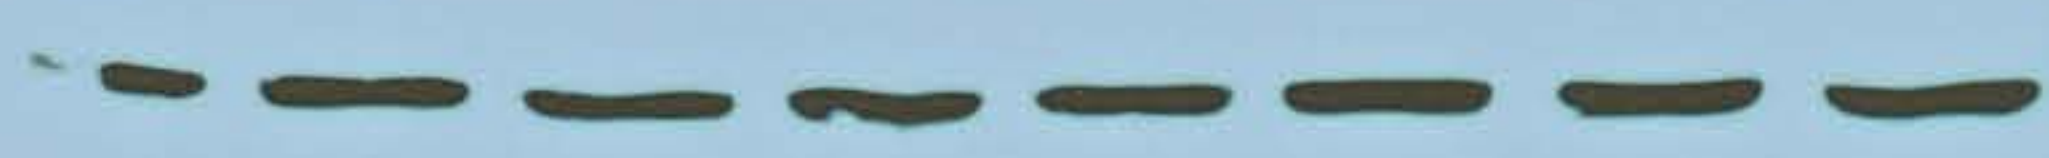

E 60"

Fig3C-4

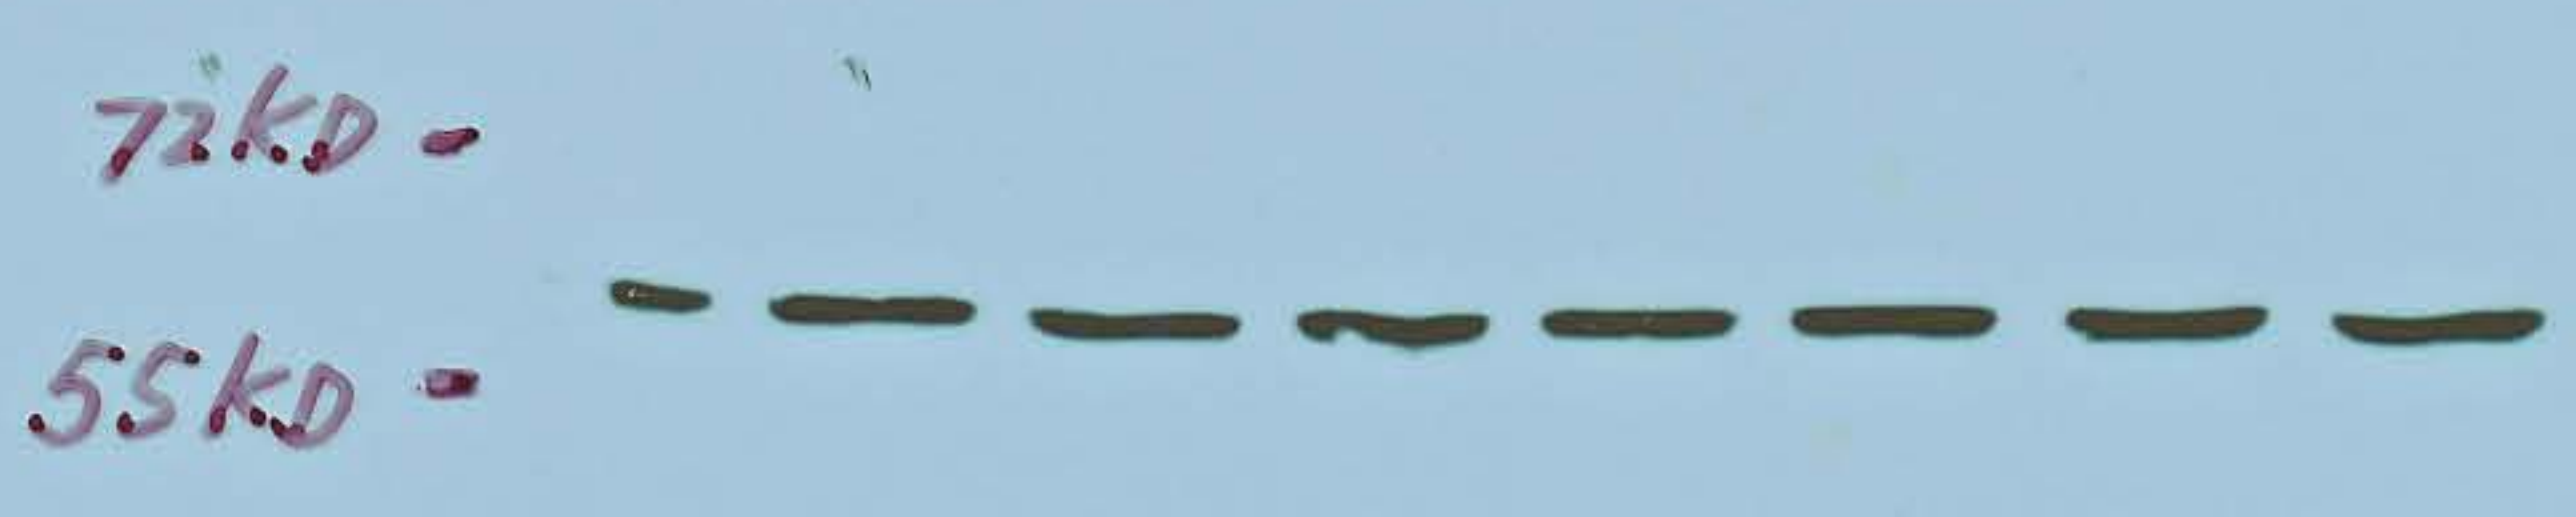

E 30"

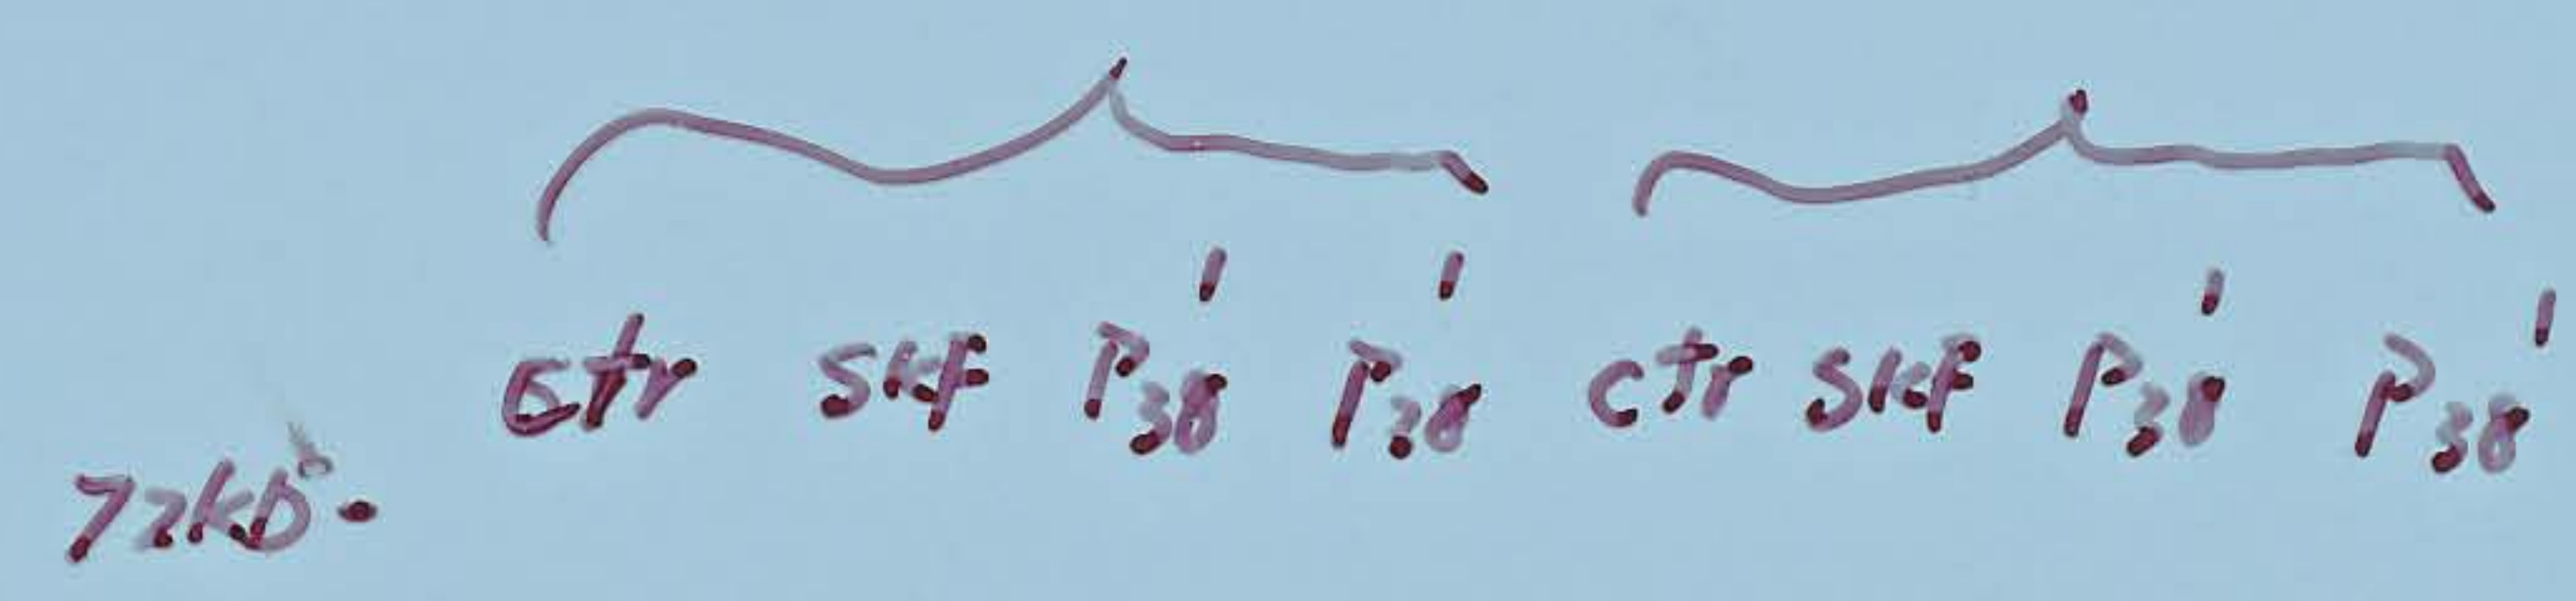

← Total Src

E 20"



10-9-09, m 10/869A, samples: 9-24-09

Exp: IP/NR2B, IB/4G10 -A

Fig3D-1

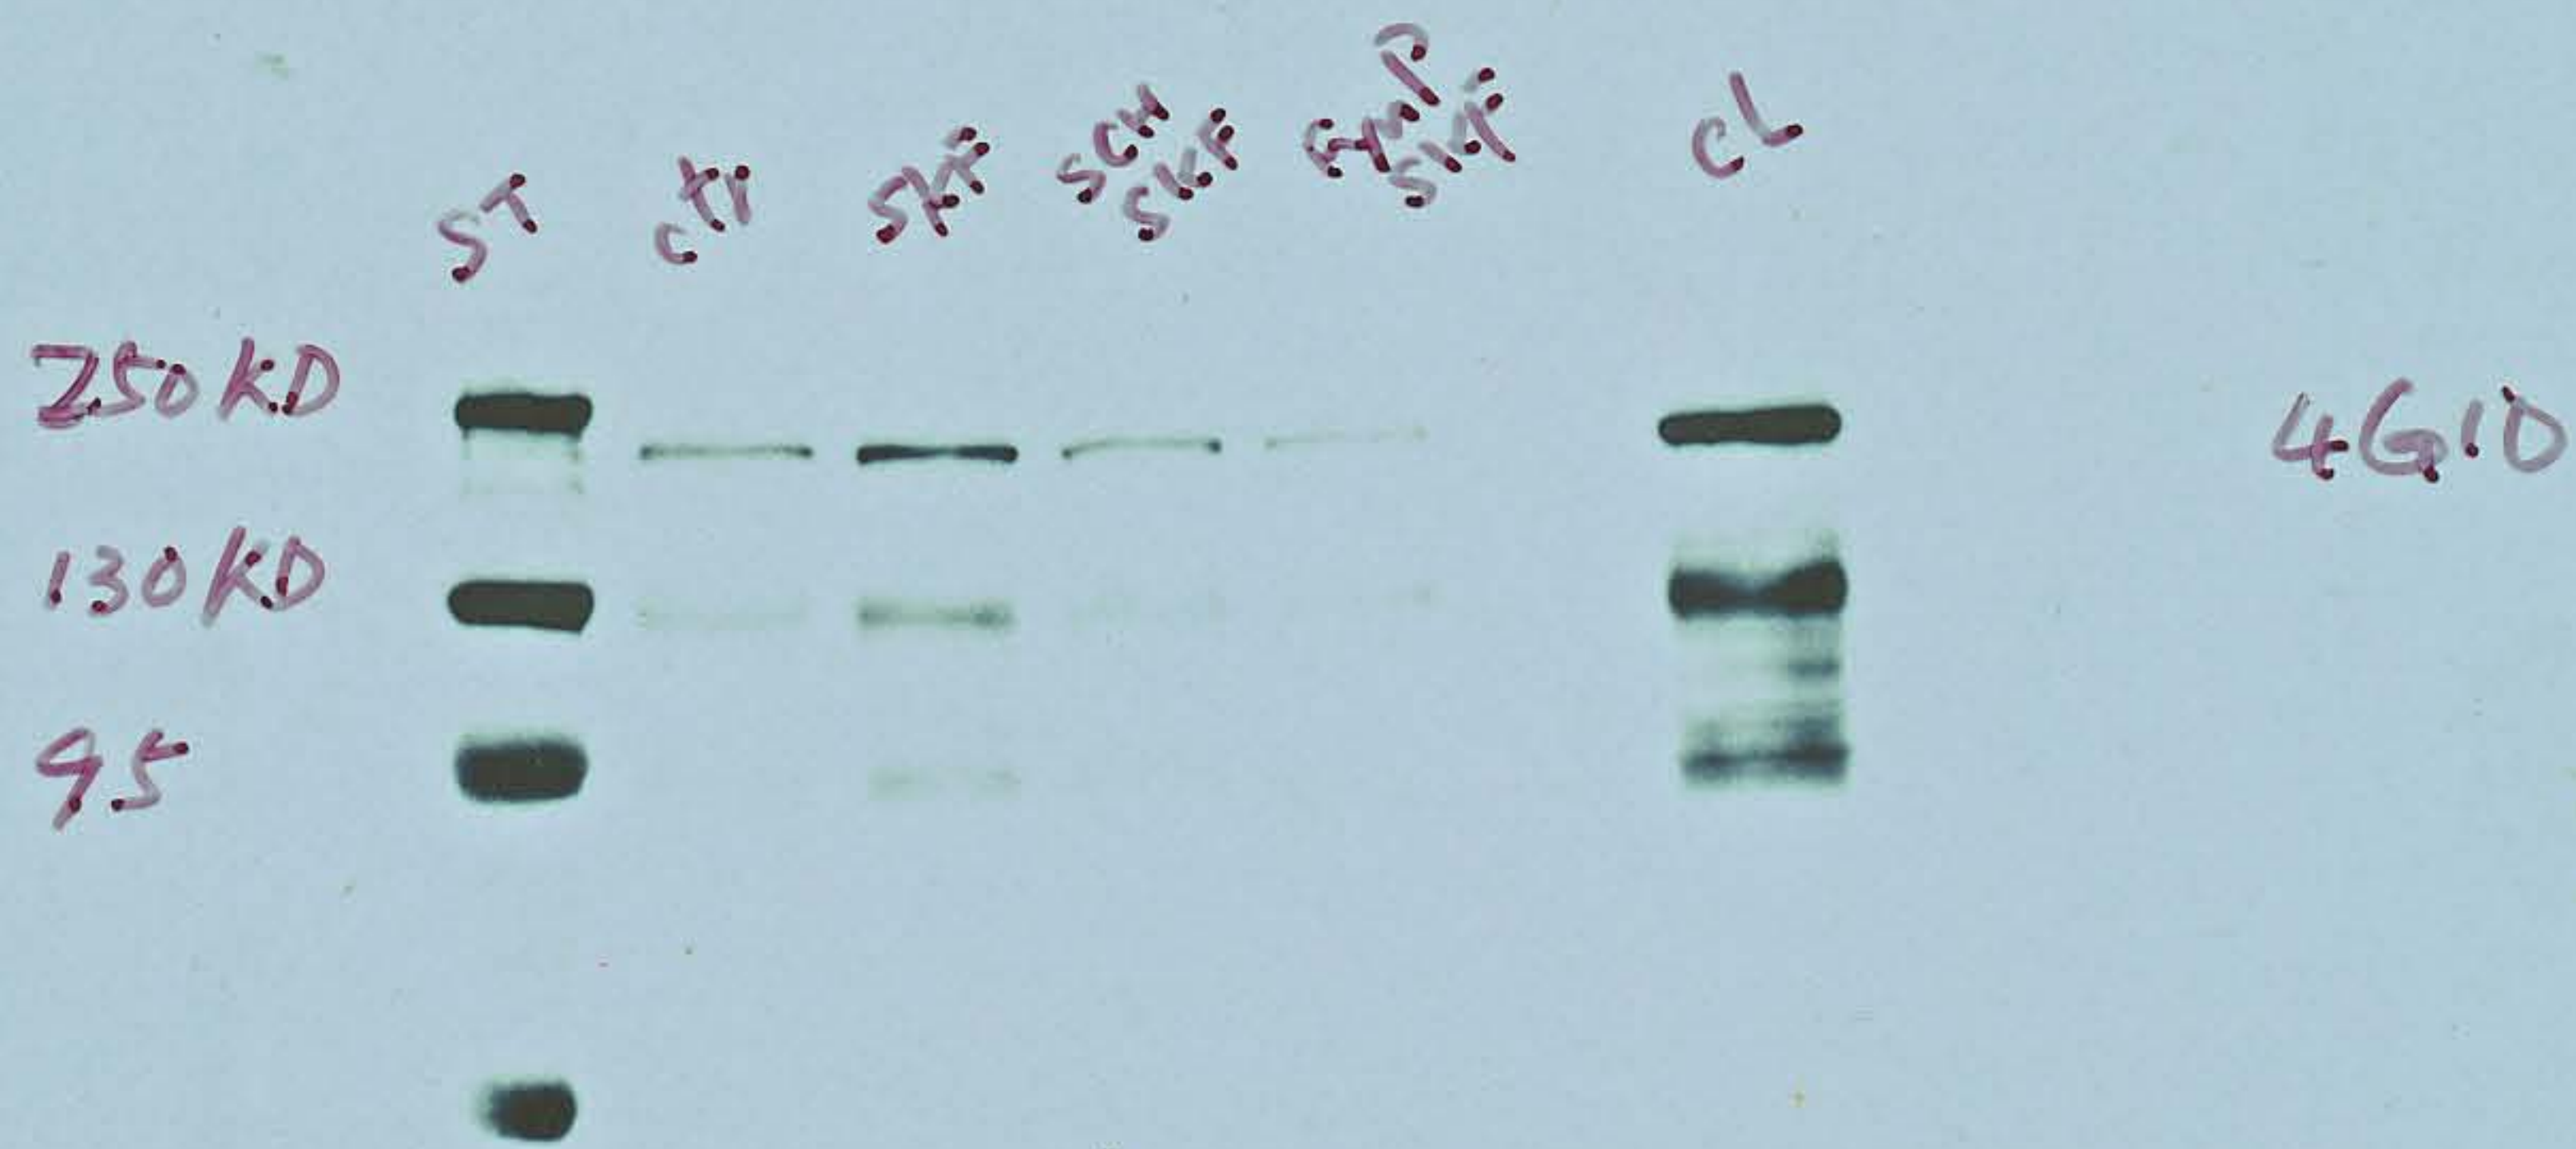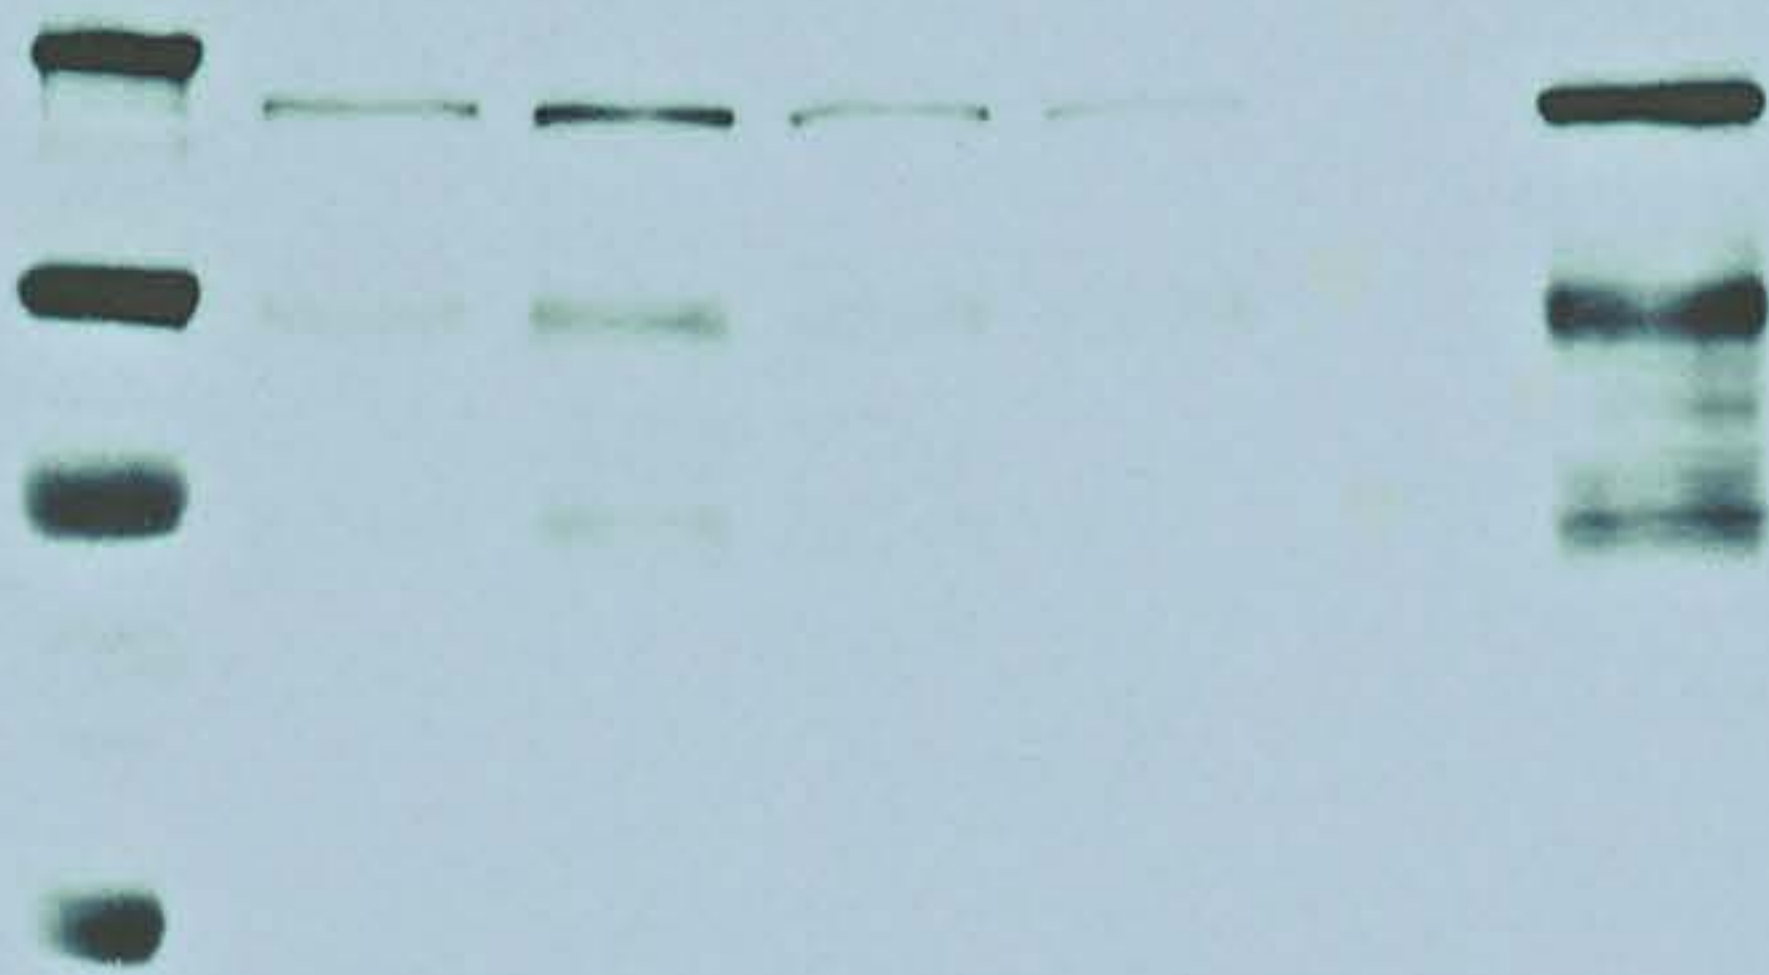



10-14-09 - m10/8/09A

Samples: 9-24-07

Exp: IP/NR2B, IB/NR2B

T/T

Fig3D-2

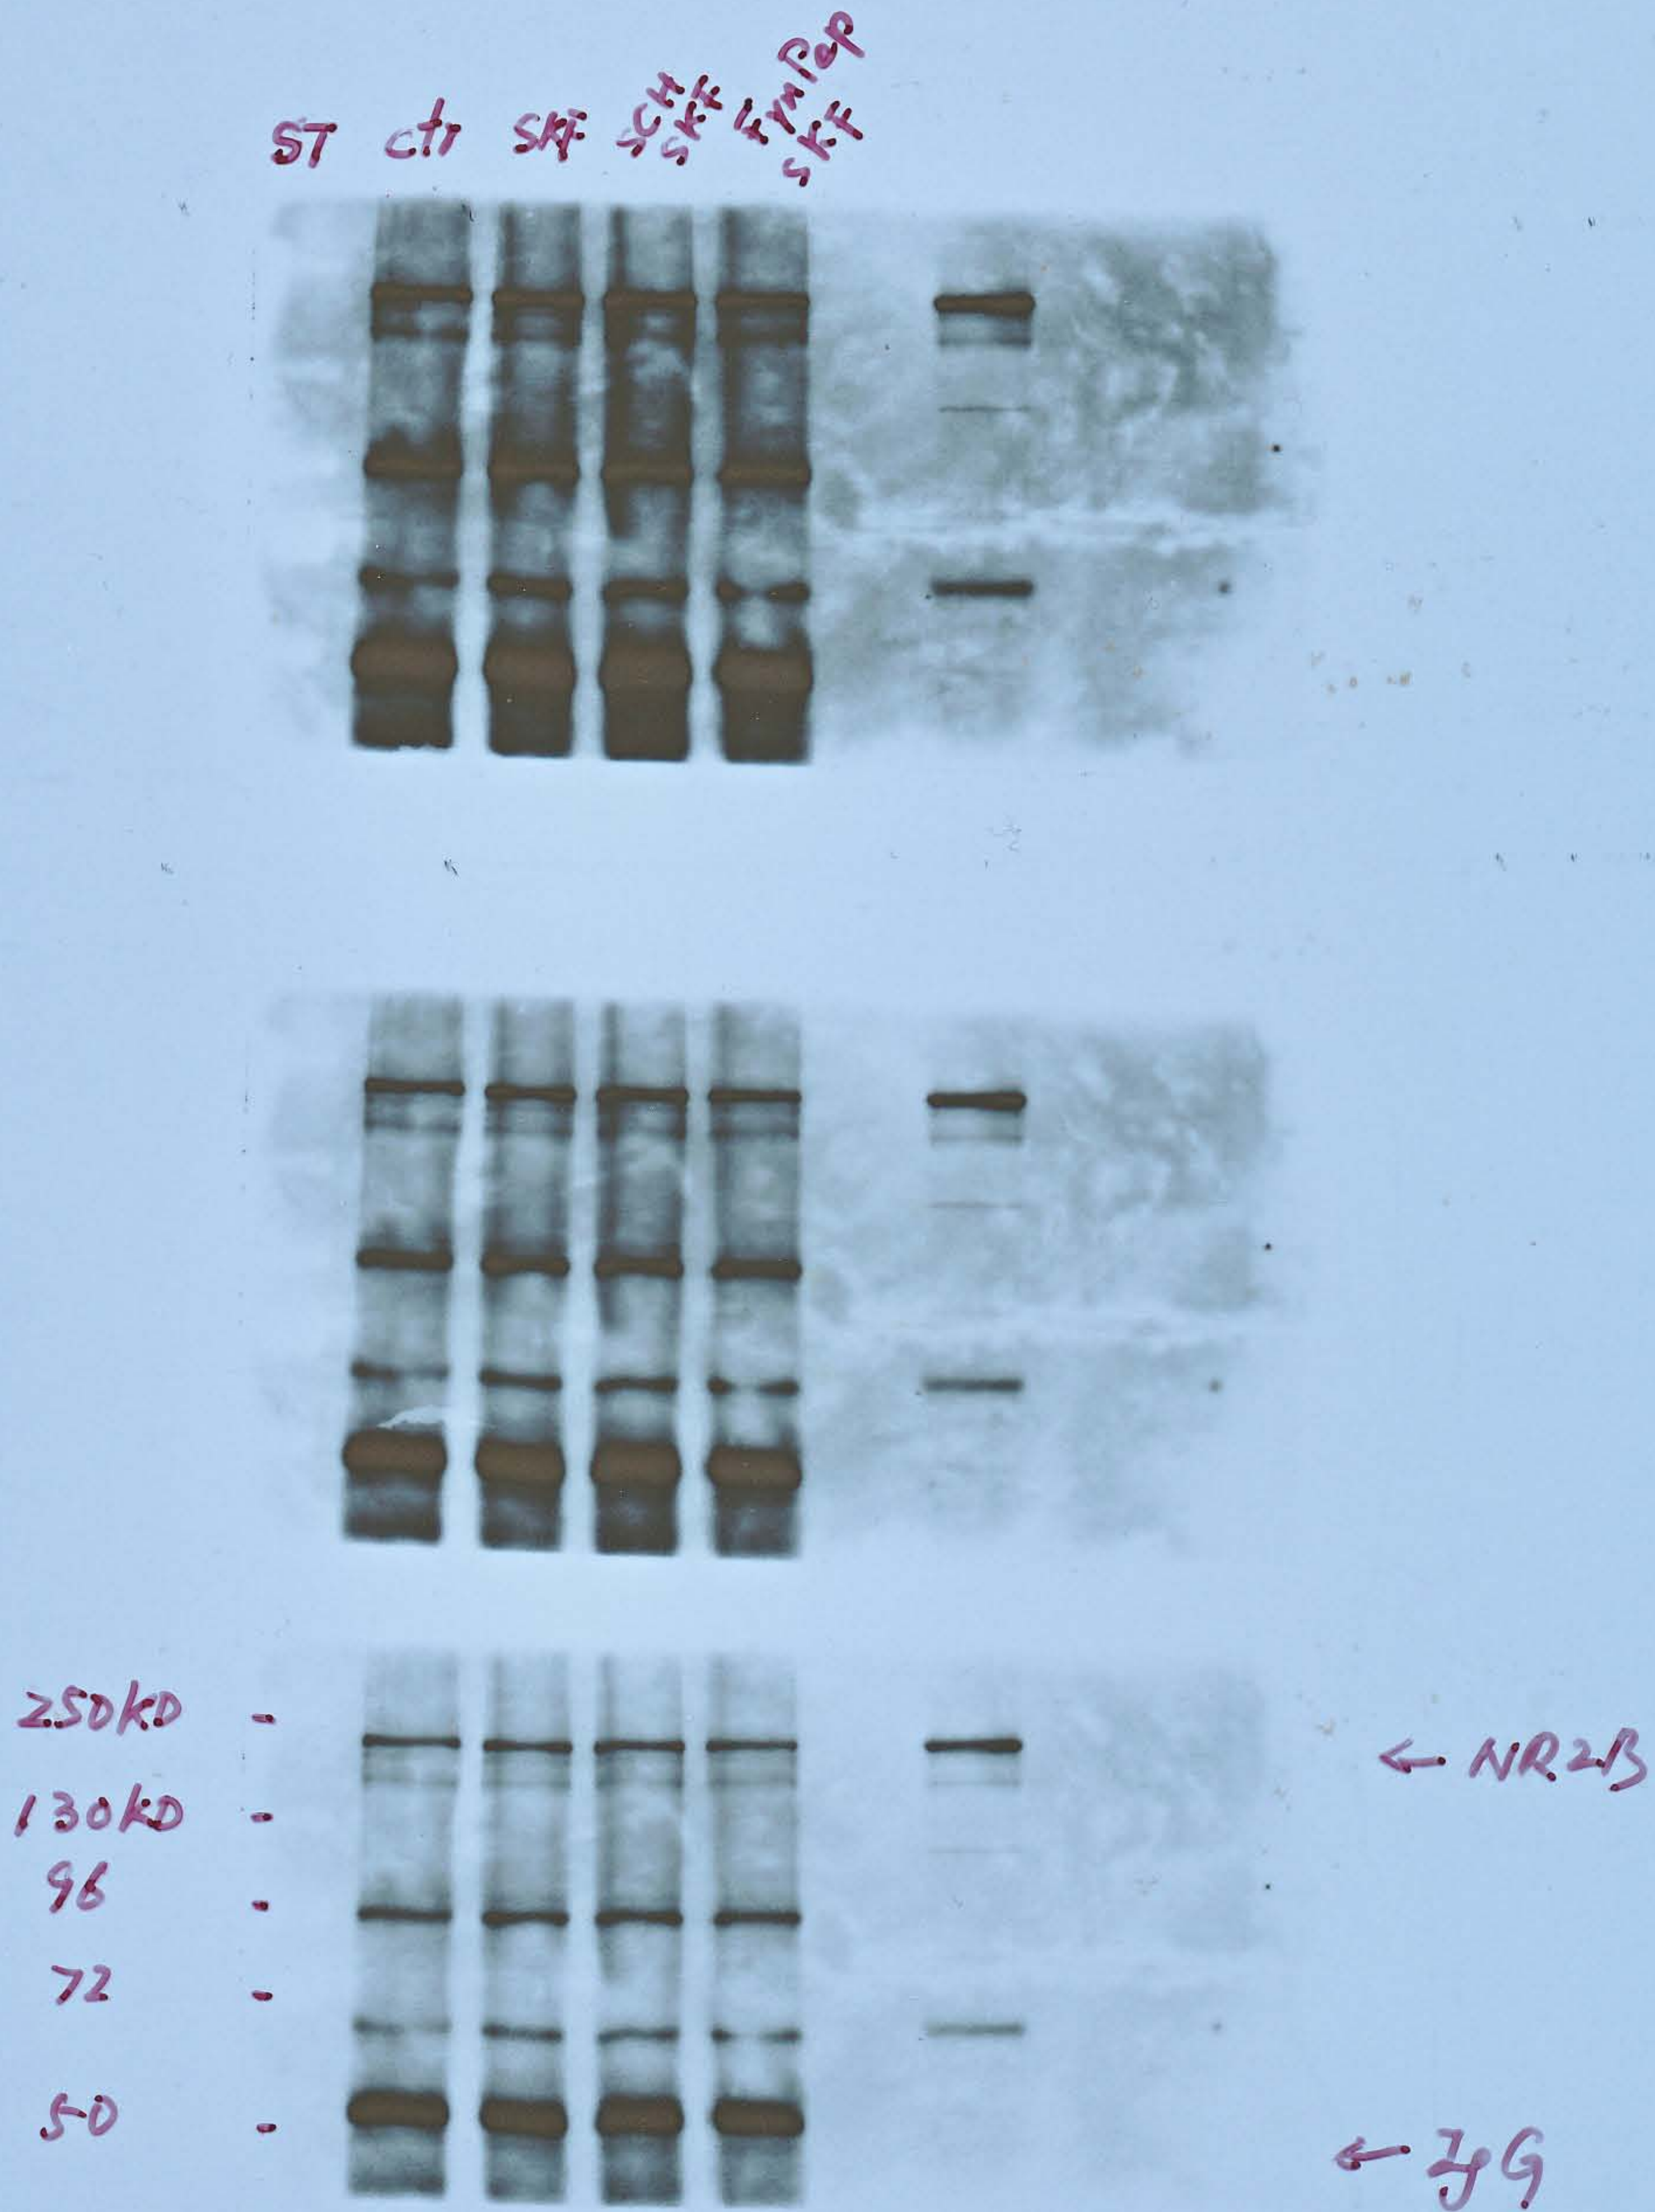



4/30/09 m4/29A

Samples - 4/21/09 (slices, 200  $\mu$ M), 200  $\mu$ l

Ab: NR2A (Enzo, # SA-425) 5  $\mu$ l

Exp. IP: NR2A; IB: 4G10

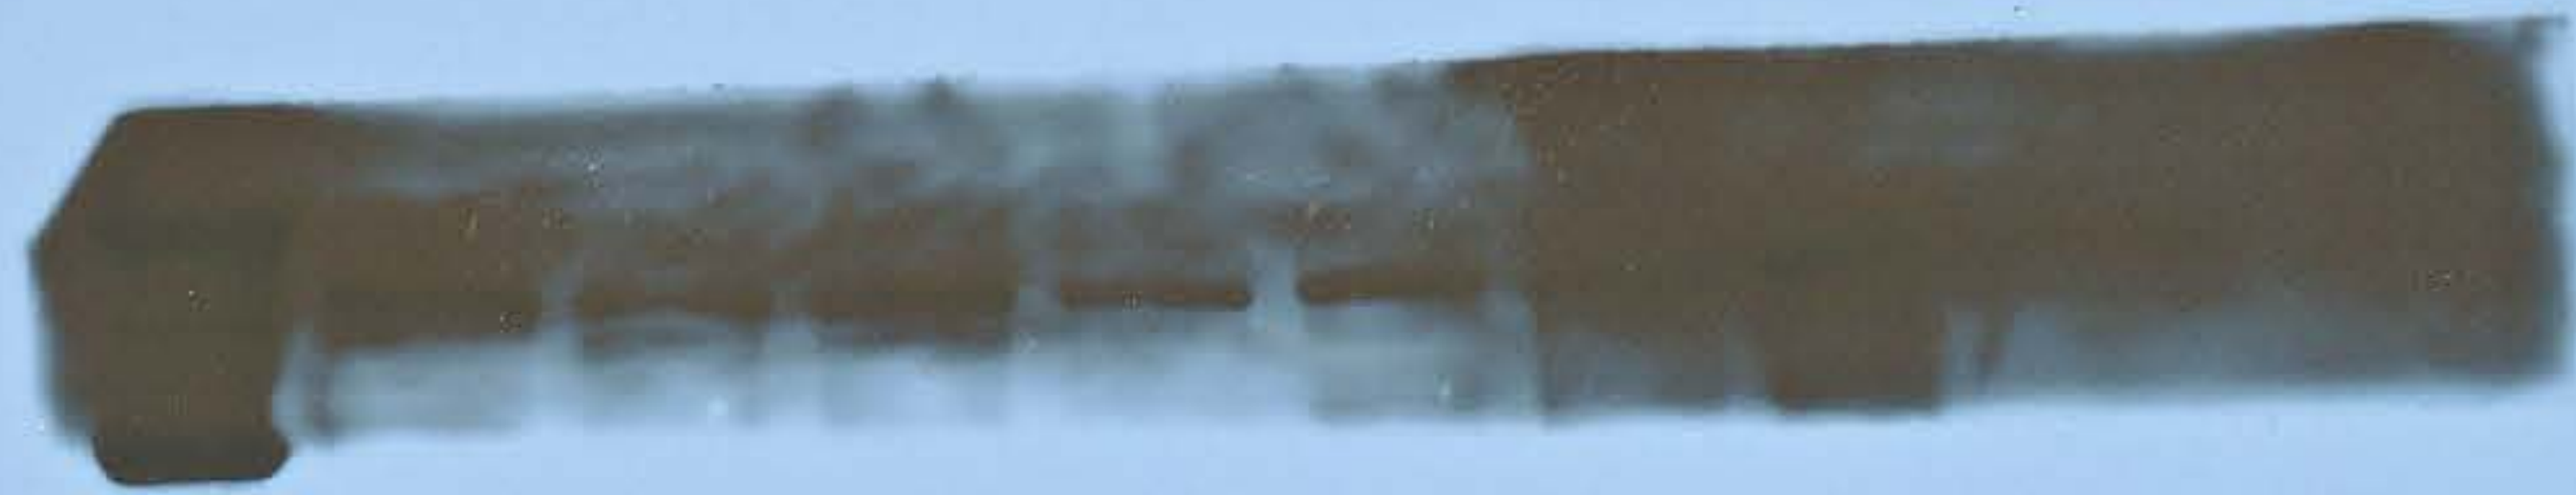

E 90"

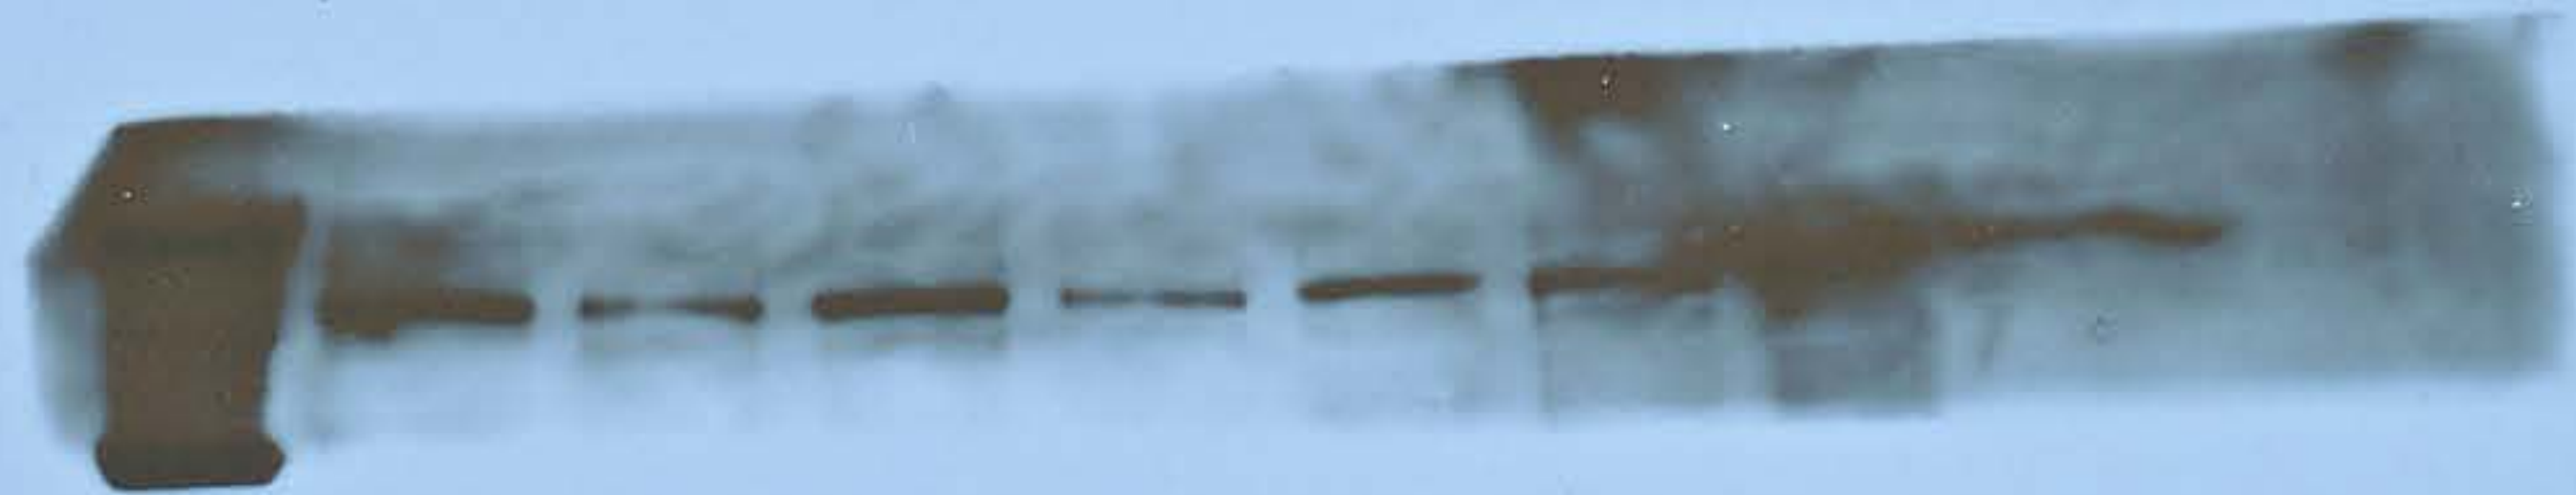

E 60"

Fig3D-3

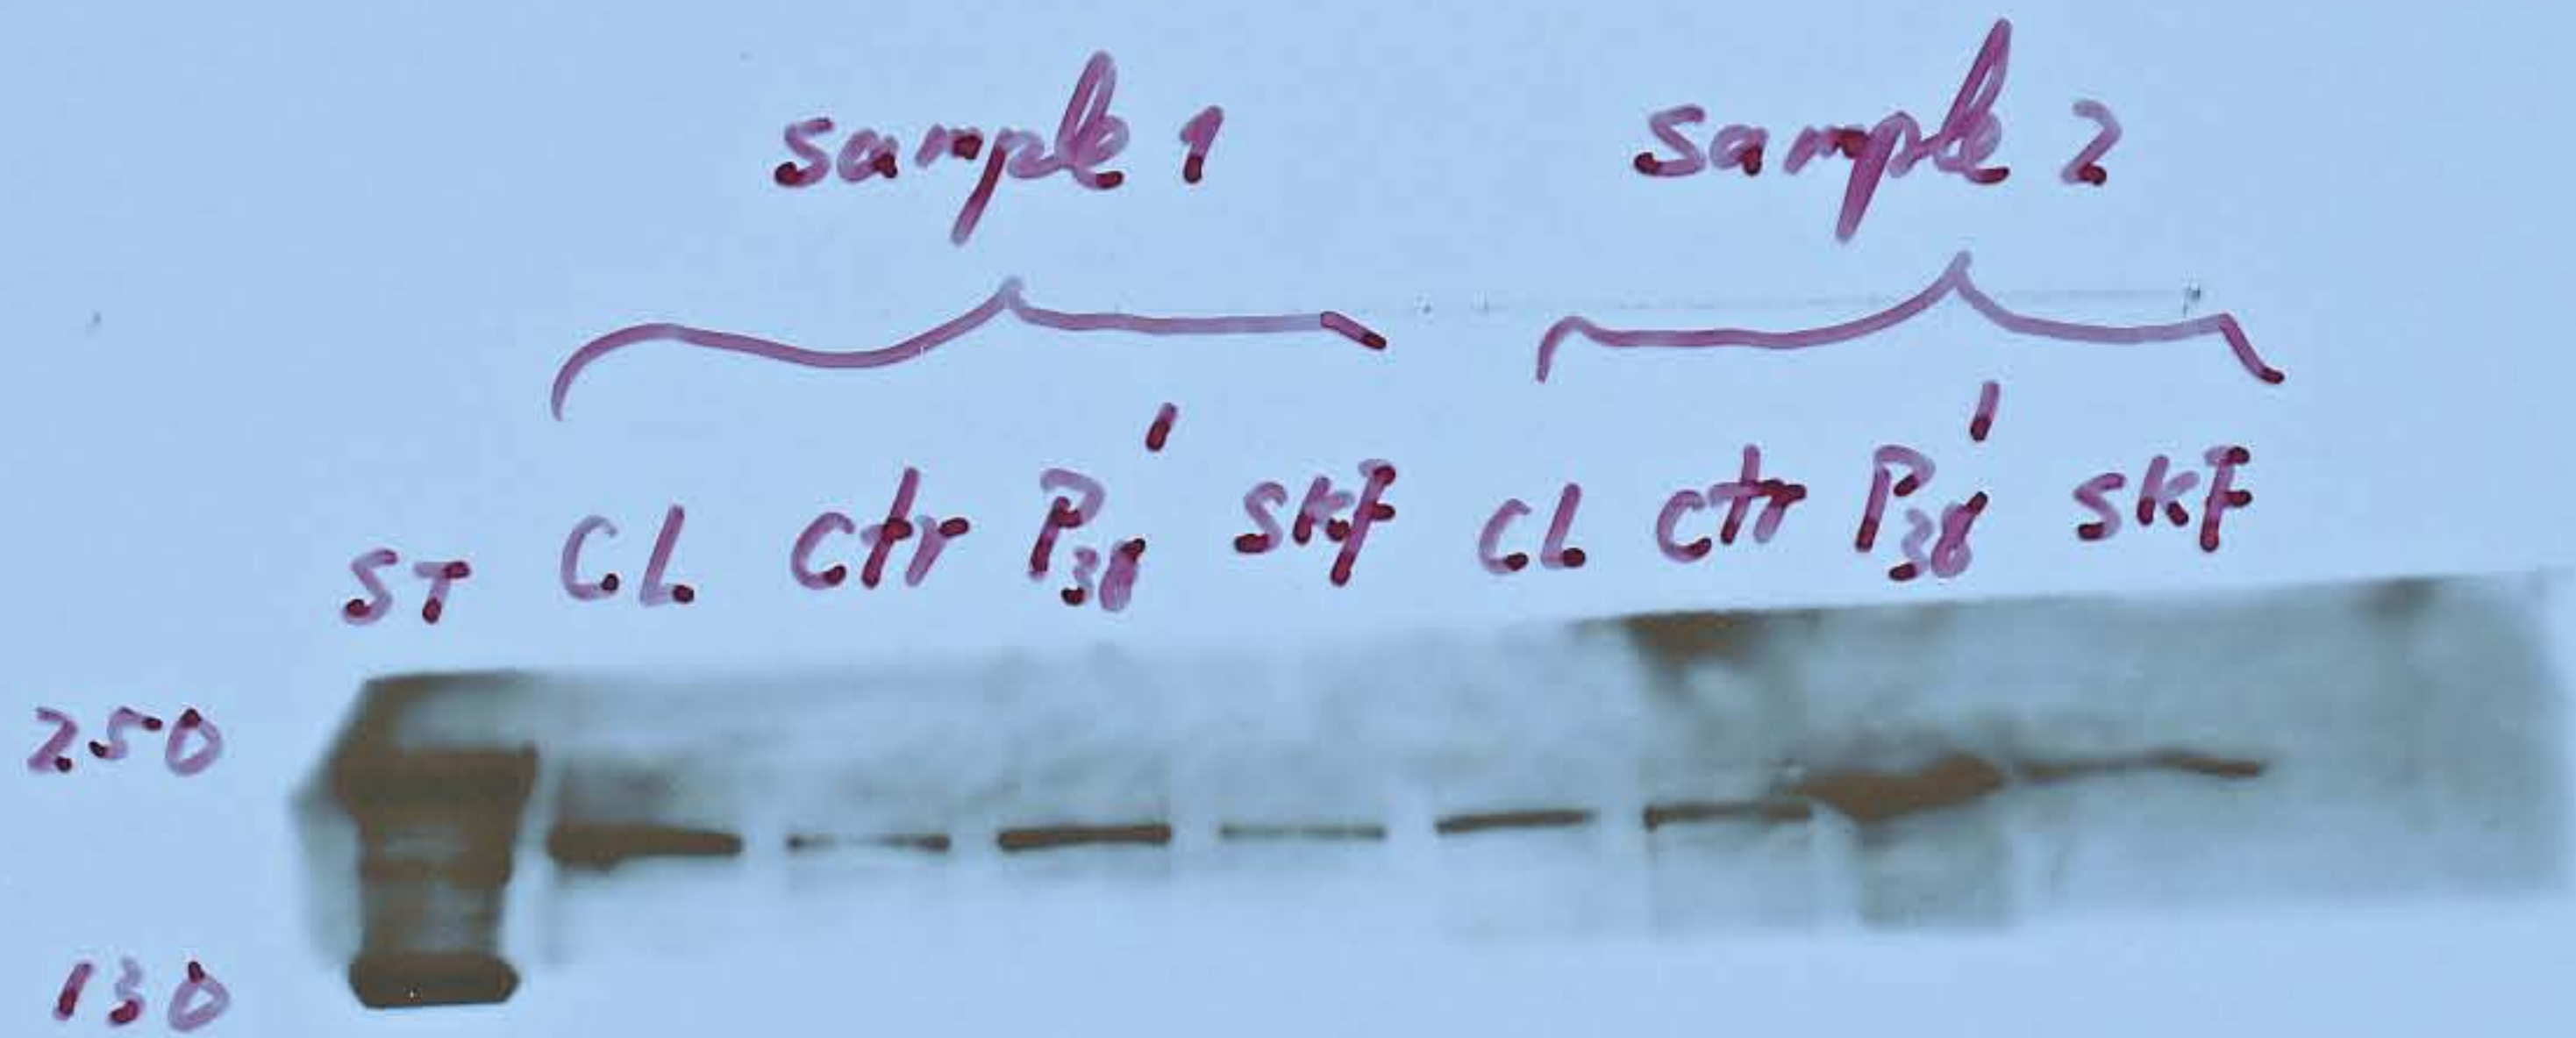

E 40"

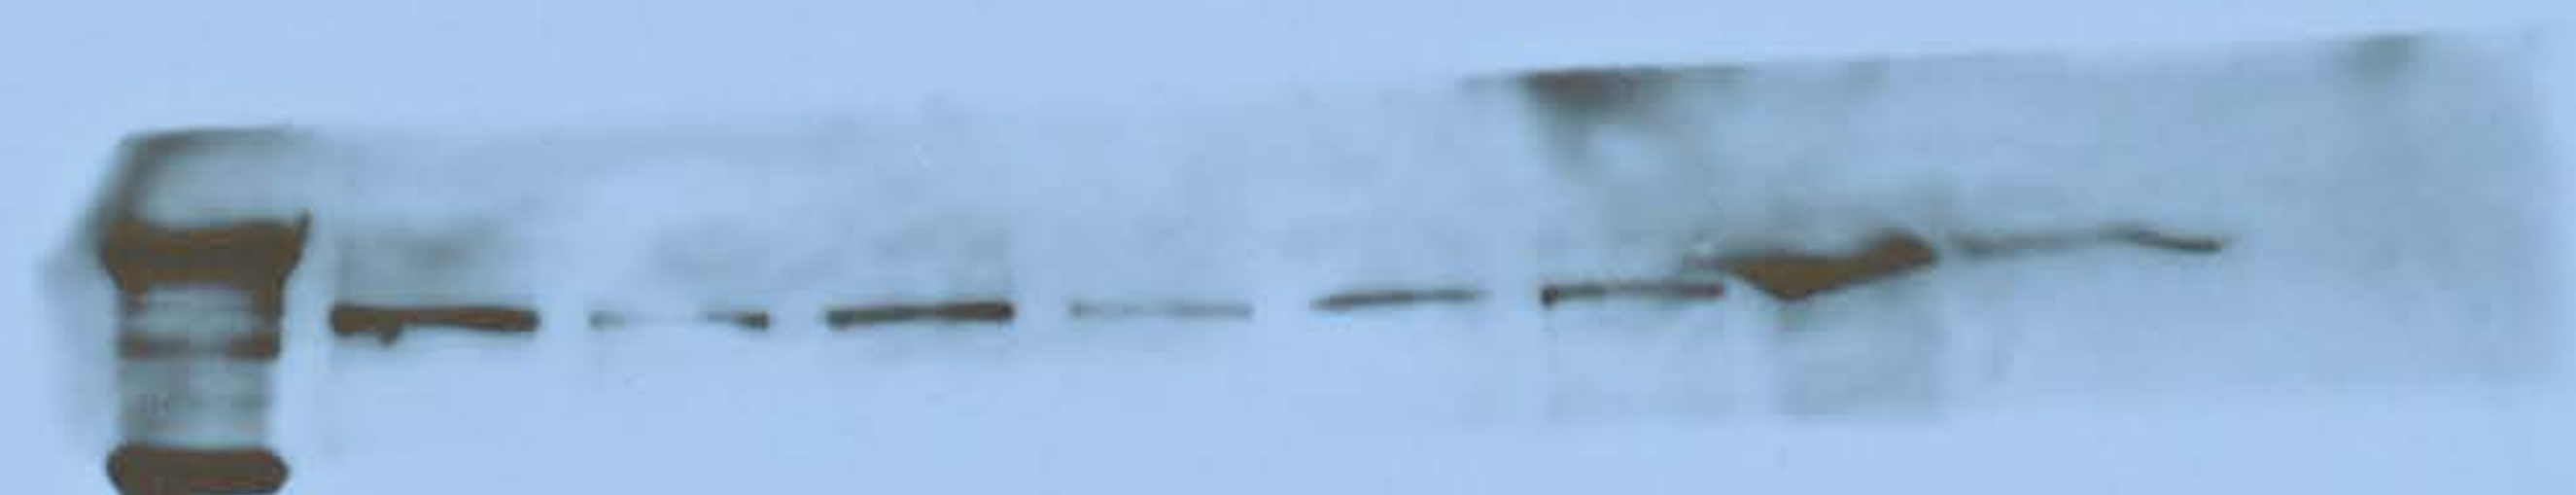

E 20"



5/1/09 m4/29A<sup>2/2</sup>, Exp: IP: NR2A; IB: NR2A

Fig3D-4

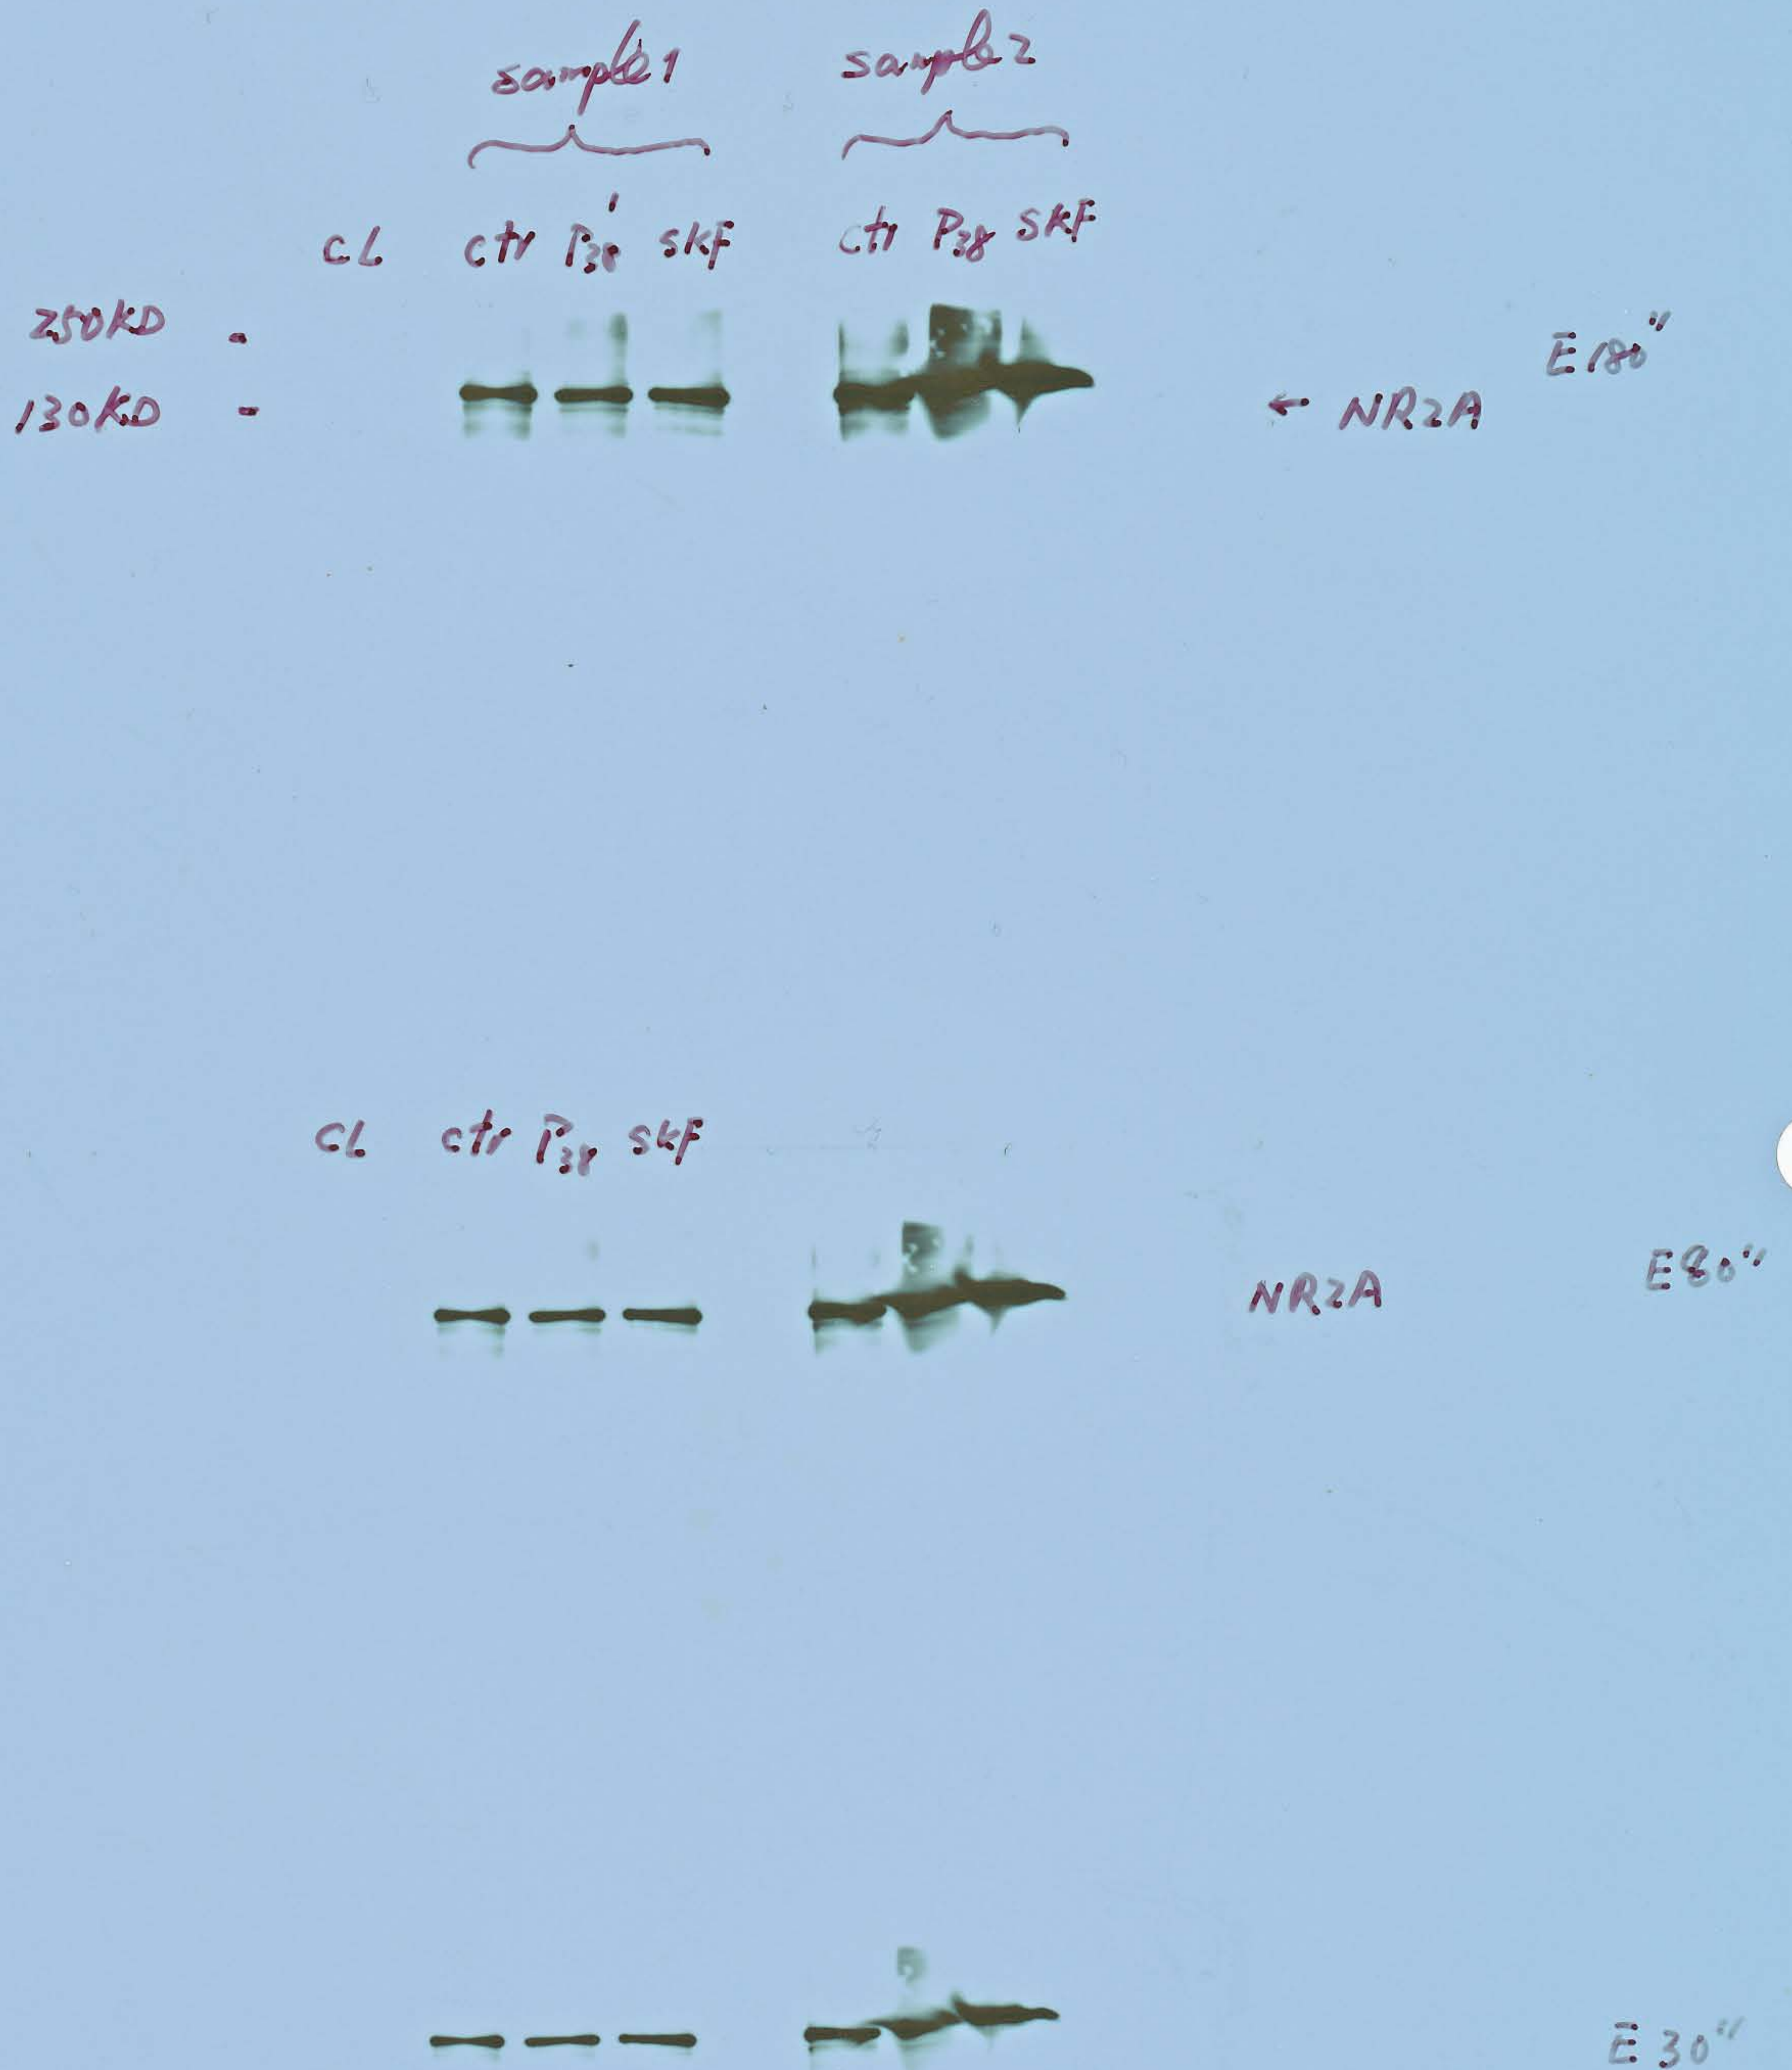

Supplement: emboj2011453s2.pdf [file emboj2011453s2.pdf]
